# Supplementary material
Source: PubMed Central journal article supplement (PMC3542466)
Supplement: mmc1.pdf [file mmc1.pdf]

American Journal of Human Genetics, Volume 92

## Supplemental Information

### Genomic Pathology of SLE-Associated

#### Copy Number Variation at the *FCGR2C/3B/2B* Locus

Michael Mueller, Paula Barros, Abigail S. Witherden, Amy L. Roberts, Zhou Zhang, Helmut Schaschl, Chack-Yung Yu, Matthew E. Hurles, Catherine Schaffner, R. Andres Floto, Laurence Game, Karyn Meltz Steinberg, Richard K. Wilson, Tina A. Graves, Evan E. Eichler, H. Terence Cook, Timothy J. Vyse, and Timothy J. Aitman

### Supplemental Inventory

#### Supplemental Figures and Tables

Figure S1

Figure S2

Figure S3

Figure S4

Table S1

Table S2

Table S3

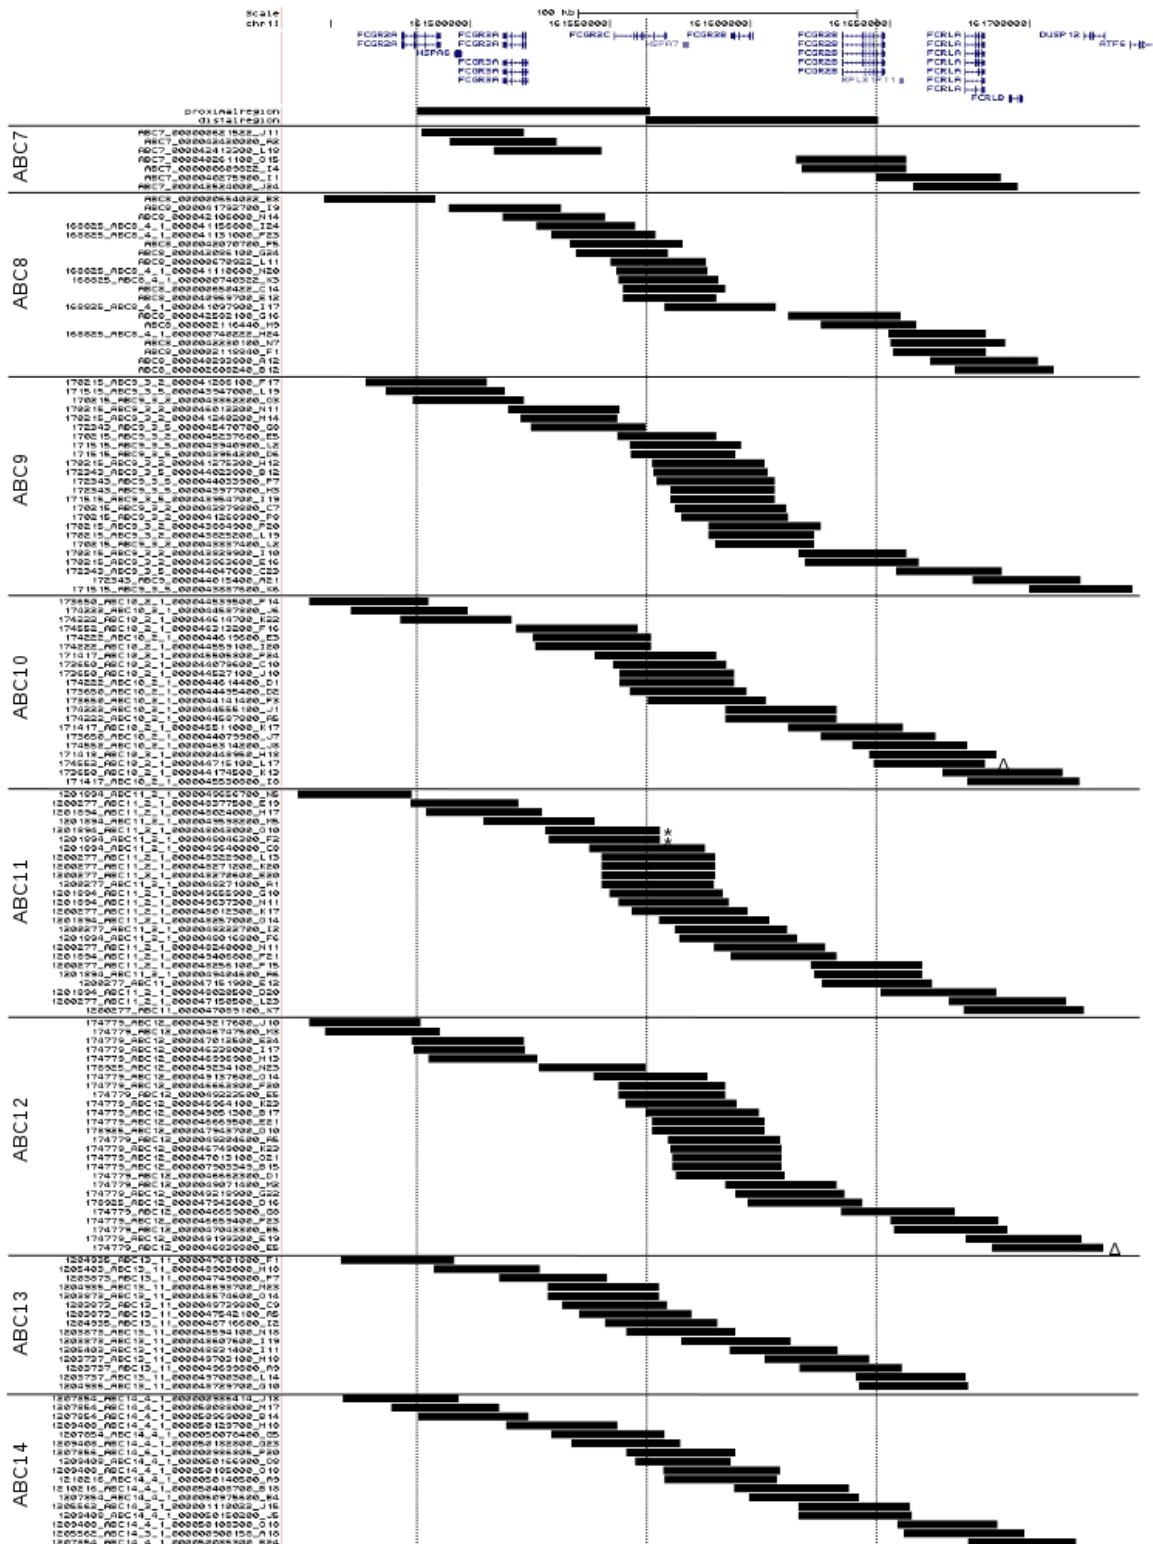

### Figure S1. Fosmid Insert Tiling across the *FCGR* Locus

UCSC genome browser screen shot of fosmid insert mapping to the GRCh37/hg19 assembly by end sequence pair (ESP) alignment. *FCGR* gene loci and extent of the proximal and distal regions of segmental sequence similarity are shown at the top. Vertical dashed lines indicate the borders of proximal and distal regions. Fosmids are grouped by individual. \* = *de novo* assembly and haplotype analysis of the fosmid clone showed that it was derived from a duplicated *FCGR3B* locus and contained a chimeric *FCGR2B-5'/FCGR2C-3'* gene. The ESP mapping to the “normal” copy reference genome shown here is therefore invalid.  $\Delta$  = the ESPs of the fosmid clone mapped to the *FCGR* locus but the assembled insert sequence mapped elsewhere in the genome.

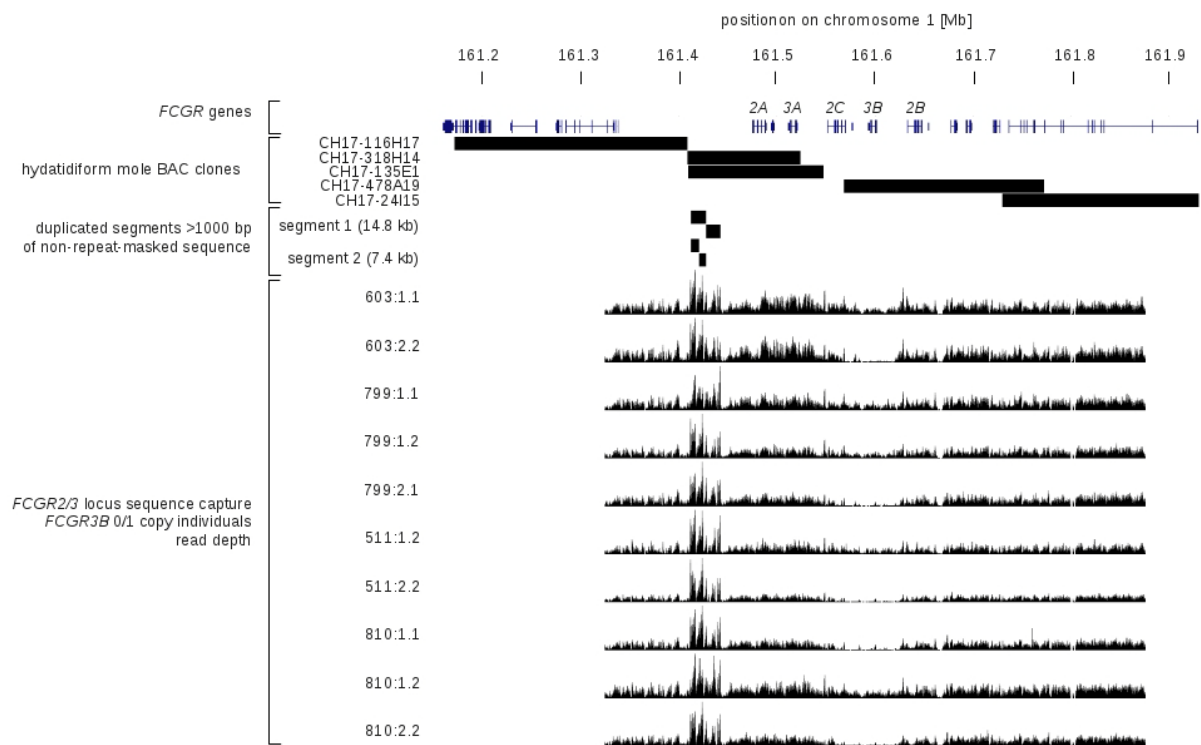

### Figure S2. Genomic Organization of the *FCGR2/3* Locus Confirmed by Sequencing of Hydatidiform Mole BAC Clones

Five hydatidiform mole BAC clones flanking as well as tiling across the *FCGR2/3* locus were sequenced to confirm the genomic organization in the GRCh37/hg19 reference assembly. Alignment of the assembled insert sequences to the reference genome confirmed the overall organization of the locus but showed that the length of clones CH17-318H14 and CH17-135E1 was discordant with the average expected insert size of the BAC clone library of ~200kb. However, this discrepancy was explained by the presence of a large tandem repeat region 14.8kb in length upstream of the *FCGR2A* gene (segment 1) which in turn is composed of a smaller tandem repeat segments of 7.4kb (segment 2). While the reference sequence contains two copies of the 14.8kb segment, sequence capture data obtained from the *FCGR2/3* locus in zero- (603:2.2, 799:2.1, 511:2.2, 810:1.1, 810:2.2) and one- (603:1.1, 799:1.1, 799:1.2, 511:1.2, 810:1.2) copy individuals to carry out read depth based CNV analysis (see Supplemental Figure 4) suggested that the segment is repeated approximately eight times. Taking this into account the corrected insert size of clones CH17-135E1 and CH17-318H14 was 226,509bp and 204,182bp instead of 137,709bp and 115,382bp, respectively, as initially suggested by the reference mapping.

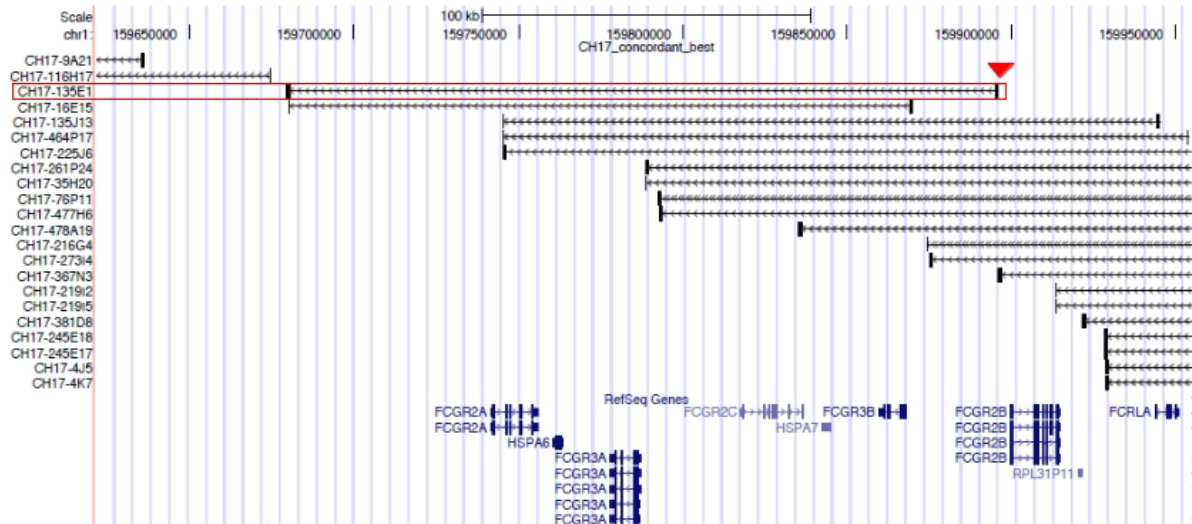

**Figure S3. Mapping of End Sequence Pairs of Hydatidiform Mole BAC Inserts Tiling Across the *FCGR2/3* Locus**

UCSC genome browser screen shot of BAC inserts mapped to the NCBI36/hg18 assembly by end sequence pair (ESP) alignment. The 3'-end (red arrow) of clone CH17-135E1 maps (incorrectly) to the reference sequence of the *FCGR2B* locus.

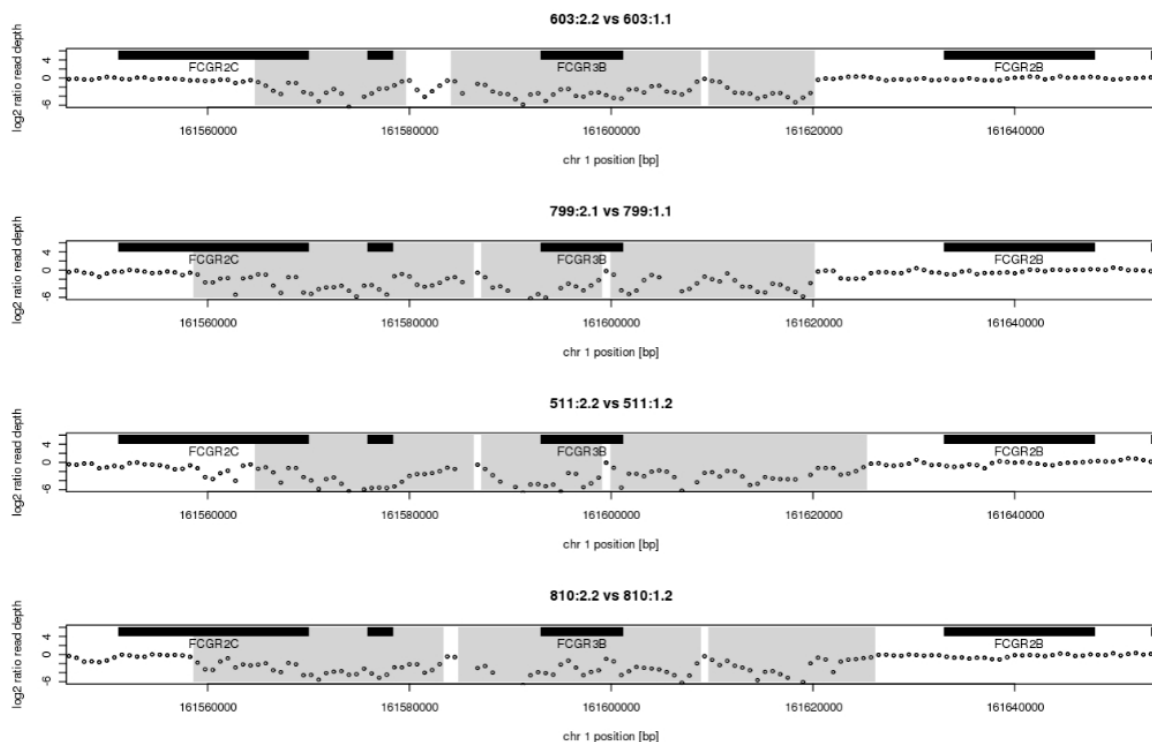

**Figure S4. CNV-seq Analysis to Detect Copy Number Variable Regions in *FCGR3B* Zero-Copy Individuals**

Dots show the  $\log_2$  ratio of read depth in 1.5kb windows between zero-copy offspring and one-copy parent. Horizontal black bars show the location of gene loci including *HSPA7* (not labeled). Windows with  $\log_2(\text{ratio})$  smaller  $-0.69$  or greater  $0.69$  ( $\sim 1.6$ -fold difference in read depth) at  $P < 0.05$  were considered copy-number variable. Grey areas show regions of four or more consecutive CNV windows.

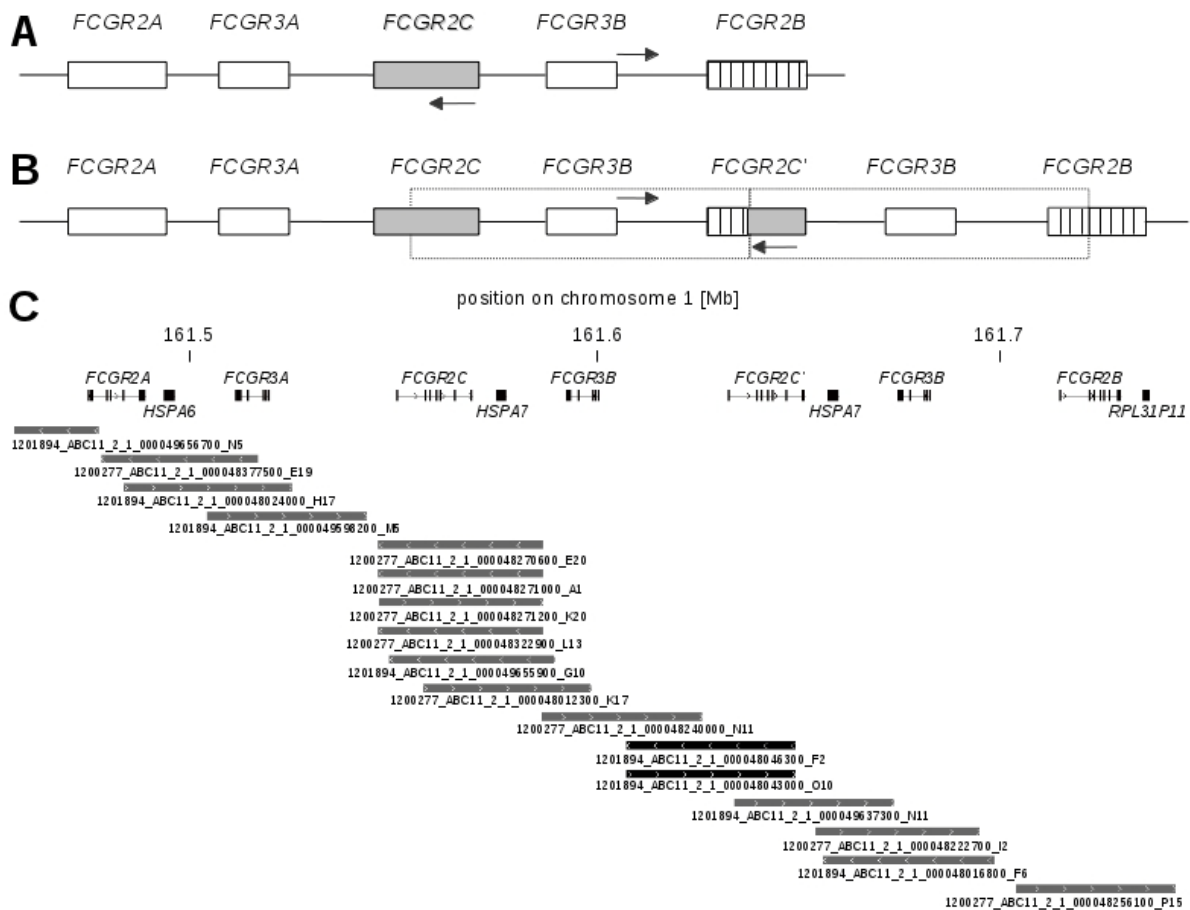

**Figure S5. Organization of the *FCGR2/3* Locus Carrying a Duplication of *FCGR3B***

(A) Organization of the *FCGR2/3* locus in the reference assembly. Arrows show the (discordant) alignment of the end pair sequences of fosmid 1201894\_ABC11\_2\_1\_000048046300\_F2, derived from an individual with an *FCGR3B* duplication.

(B) Organization of the *FCGR2/3* locus with a duplication of *FCGR3B* reconstructed from sequencing of fosmid inserts from individual ABC11. Dotted boxes indicate the segmental duplication. Arrows show the (concordant) alignment of the end pair sequences of fosmid 1201894\_ABC11\_2\_1\_000048046300\_F2.

(C) Tiling of fosmid clones across the *FCGR3B* two-copy locus. The two fosmid clones, including 1201894\_ABC11\_2\_1\_000048046300\_F2, that cross the CNV breakpoint are shown in black.

**Table S1. List of Candidate PSVs Identified by Reference Sequence (hg19) Alignment and SNPs at Candidate PSV Positions Detected by Sequencing of Fosmid Clones from Eight Individuals**

| proximal |           |                 |     | distal |           |                 |     | poly-morphic |
|----------|-----------|-----------------|-----|--------|-----------|-----------------|-----|--------------|
| chr      | position  | PSV<br>"allele" | SNP | chr    | position  | PSV<br>"allele" | SNP |              |
| 1        | 161480913 | T               | -   | 1      | 161562577 | C               | -   | -            |
| 1        | 161480918 | G               | -   | 1      | 161562582 | C               | -   | -            |
| 1        | 161480920 | C               | -   | 1      | 161562584 | T               | -   | -            |
| 1        | 161481029 | A               | -   | 1      | 161562692 | G               | -   | -            |
| 1        | 161481063 | T               | -   | 1      | 161562726 | C               | -   | -            |
| 1        | 161481090 | C               | -   | 1      | 161562753 | T               | -   | -            |
| 1        | 161481094 | G               | -   | 1      | 161562757 | A               | -   | -            |
| 1        | 161481097 | T               | -   | 1      | 161562760 | C               | -   | -            |
| 1        | 161481108 | T               | -   | 1      | 161562771 | C               | -   | -            |
| 1        | 161481114 | A               | -   | 1      | 161562777 | G               | -   | -            |
| 1        | 161481123 | T               | -   | 1      | 161562793 | A               | T   | +            |
| 1        | 161481127 | T               | -   | 1      | 161562797 | G               | -   | -            |
| 1        | 161481143 | T               | -   | 1      | 161562813 | A               | -   | -            |
| 1        | 161481145 | T               | -   | 1      | 161562815 | C               | -   | -            |
| 1        | 161481146 | G               | -   | 1      | 161562816 | A               | -   | -            |
| 1        | 161481158 | T               | -   | 1      | 161562826 | G               | -   | -            |
| 1        | 161481165 | A               | -   | 1      | 161562833 | G               | -   | -            |
| 1        | 161481188 | G               | -   | 1      | 161562856 | T               | -   | -            |
| 1        | 161481345 | G               | -   | 1      | 161563005 | A               | G   | +            |
| 1        | 161481394 | T               | -   | 1      | 161563054 | C               | -   | -            |
| 1        | 161481401 | A               | -   | 1      | 161563061 | G               | -   | -            |
| 1        | 161481418 | A               | -   | 1      | 161563078 | G               | -   | -            |
| 1        | 161481479 | T               | -   | 1      | 161563139 | C               | -   | -            |
| 1        | 161481519 | T               | A/C | 1      | 161563179 | C               | -   | +            |
| 1        | 161481530 | G               | A   | 1      | 161563190 | A               | -   | +            |
| 1        | 161481546 | T               | C   | 1      | 161563206 | C               | -   | +            |
| 1        | 161481561 | C               | T   | 1      | 161563221 | T               | C   | +            |
| 1        | 161481567 | G               | T   | 1      | 161563227 | T               | -   | +            |
| 1        | 161481617 | A               | -   | 1      | 161563277 | G               | -   | -            |
| 1        | 161481671 | C               | -   | 1      | 161563330 | T               | -   | -            |
| 1        | 161481672 | T               | -   | 1      | 161563331 | G               | -   | -            |
| 1        | 161481673 | G               | -   | 1      | 161563332 | C               | -   | -            |
| 1        | 161481729 | A               | -   | 1      | 161563388 | G               | -   | -            |
| 1        | 161481734 | G               | -   | 1      | 161563393 | A               | -   | -            |
| 1        | 161481743 | A               | G   | 1      | 161563402 | G               | -   | +            |
| 1        | 161481762 | C               | -   | 1      | 161563421 | T               | -   | -            |
| 1        | 161481764 | A               | -   | 1      | 161563423 | G               | -   | -            |
| 1        | 161481777 | T               | -   | 1      | 161563436 | C               | -   | -            |
| 1        | 161481779 | T               | -   | 1      | 161563438 | C               | -   | -            |
| 1        | 161481793 | G               | -   | 1      | 161563452 | T               | -   | -            |
| 1        | 161481800 | G               | -   | 1      | 161563459 | T               | -   | -            |
| 1        | 161481848 | G               | -   | 1      | 161563507 | T               | -   | -            |
| 1        | 161481853 | T               | -   | 1      | 161563512 | C               | -   | -            |
| 1        | 161481855 | A               | -   | 1      | 161563514 | G               | -   | -            |
| 1        | 161481863 | A               | -   | 1      | 161563522 | G               | -   | -            |
| 1        | 161481865 | G               | -   | 1      | 161563524 | T               | -   | -            |
| 1        | 161481878 | G               | -   | 1      | 161563537 | A               | -   | -            |
| 1        | 161482360 | A               | G   | 1      | 161564019 | G               | A   | +            |

|   |           |   |   |   |           |   |     |   |
|---|-----------|---|---|---|-----------|---|-----|---|
| 1 | 161482390 | C | T | 1 | 161564049 | T | C   | + |
| 1 | 161482434 | T | G | 1 | 161564093 | A | T/G | + |
| 1 | 161482443 | T | C | 1 | 161564102 | C | T   | + |
| 1 | 161482449 | C | T | 1 | 161564108 | T | C   | + |
| 1 | 161482494 | G | - | 1 | 161564153 | C | G   | + |
| 1 | 161482520 | T | C | 1 | 161564179 | C | -   | + |
| 1 | 161482598 | A | - | 1 | 161564257 | G | A   | + |
| 1 | 161482648 | G | - | 1 | 161564307 | A | G   | + |
| 1 | 161482689 | G | - | 1 | 161564348 | A | G   | + |
| 1 | 161482711 | A | - | 1 | 161564370 | G | A   | + |
| 1 | 161482728 | C | - | 1 | 161564387 | T | -   | - |
| 1 | 161482733 | C | - | 1 | 161564392 | T | -   | - |
| 1 | 161482740 | C | - | 1 | 161564399 | T | -   | - |
| 1 | 161482757 | G | - | 1 | 161564416 | T | -   | - |
| 1 | 161482777 | T | - | 1 | 161564436 | C | -   | - |
| 1 | 161482792 | G | - | 1 | 161564451 | C | -   | - |
| 1 | 161482809 | G | - | 1 | 161564468 | T | G   | + |
| 1 | 161482934 | C | G | 1 | 161564593 | G | C   | + |
| 1 | 161482986 | A | G | 1 | 161564645 | G | -   | + |
| 1 | 161483371 | G | - | 1 | 161565030 | A | G   | + |
| 1 | 161483484 | A | G | 1 | 161565143 | G | -   | + |
| 1 | 161483579 | C | - | 1 | 161565237 | T | -   | - |
| 1 | 161483666 | T | - | 1 | 161565324 | C | T   | + |
| 1 | 161483723 | G | - | 1 | 161565381 | A | G   | + |
| 1 | 161483750 | C | - | 1 | 161565408 | T | C   | + |
| 1 | 161483856 | A | - | 1 | 161565513 | G | -   | - |
| 1 | 161483965 | G | - | 1 | 161565622 | A | G   | + |
| 1 | 161484048 | G | A | 1 | 161565705 | A | G   | + |
| 1 | 161484109 | T | - | 1 | 161565766 | A | -   | - |
| 1 | 161484124 | A | C | 1 | 161565781 | C | -   | + |
| 1 | 161484134 | T | - | 1 | 161565791 | C | -   | - |
| 1 | 161484210 | T | C | 1 | 161565867 | C | -   | + |
| 1 | 161484479 | A | - | 1 | 161566136 | G | A   | + |
| 1 | 161484488 | T | - | 1 | 161566145 | G | T   | + |
| 1 | 161484636 | C | T | 1 | 161566293 | T | -   | + |
| 1 | 161484655 | G | - | 1 | 161566312 | C | G   | + |
| 1 | 161484864 | G | - | 1 | 161566521 | A | G   | + |
| 1 | 161484900 | C | - | 1 | 161566557 | T | C   | + |
| 1 | 161485100 | G | - | 1 | 161566757 | C | G   | + |
| 1 | 161485224 | T | - | 1 | 161566881 | C | -   | - |
| 1 | 161485248 | G | - | 1 | 161566905 | A | -   | - |
| 1 | 161485255 | G | - | 1 | 161566912 | C | -   | - |
| 1 | 161485361 | T | - | 1 | 161567018 | C | -   | - |
| 1 | 161485372 | G | - | 1 | 161567029 | A | -   | - |
| 1 | 161485406 | A | - | 1 | 161567063 | G | -   | - |
| 1 | 161485428 | A | - | 1 | 161567085 | G | -   | - |
| 1 | 161485505 | C | - | 1 | 161567162 | T | -   | - |
| 1 | 161485514 | A | - | 1 | 161567171 | T | -   | - |
| 1 | 161485684 | C | - | 1 | 161567338 | T | -   | - |
| 1 | 161485830 | A | - | 1 | 161567484 | T | -   | - |
| 1 | 161485837 | G | - | 1 | 161567491 | A | -   | - |
| 1 | 161485848 | T | - | 1 | 161567502 | C | -   | - |
| 1 | 161485869 | C | - | 1 | 161567523 | T | -   | - |
| 1 | 161486144 | A | - | 1 | 161567798 | G | -   | - |
| 1 | 161486178 | G | - | 1 | 161567832 | A | -   | - |
| 1 | 161486180 | A | - | 1 | 161567834 | G | -   | - |



|   |           |   |   |   |           |   |   |   |
|---|-----------|---|---|---|-----------|---|---|---|
| 1 | 161486396 | T | - | 1 | 161568051 | A | T | + |
| 1 | 161486430 | T | - | 1 | 161568085 | C | - | - |
| 1 | 161486443 | C | - | 1 | 161568098 | T | - | - |
| 1 | 161486615 | A | G | 1 | 161568270 | G | - | + |
| 1 | 161487035 | A | - | 1 | 161568690 | G | - | - |
| 1 | 161487092 | G | - | 1 | 161568747 | C | - | - |
| 1 | 161487095 | G | - | 1 | 161568750 | A | - | - |
| 1 | 161487106 | C | - | 1 | 161568761 | T | - | - |
| 1 | 161487137 | C | - | 1 | 161568792 | T | - | - |
| 1 | 161487145 | T | - | 1 | 161568800 | A | - | - |
| 1 | 161487262 | A | - | 1 | 161568917 | G | - | - |
| 1 | 161487293 | A | - | 1 | 161568948 | G | - | - |
| 1 | 161487373 | G | - | 1 | 161569028 | A | G | + |
| 1 | 161487456 | A | - | 1 | 161569111 | G | - | - |
| 1 | 161487474 | A | - | 1 | 161569129 | G | - | - |
| 1 | 161487487 | C | - | 1 | 161569142 | T | - | - |
| 1 | 161487493 | T | - | 1 | 161569148 | A | T | + |
| 1 | 161487764 | G | - | 1 | 161569419 | C | G | + |
| 1 | 161487805 | T | - | 1 | 161569460 | C | - | - |
| 1 | 161487964 | T | - | 1 | 161569619 | C | - | - |
| 1 | 161488159 | C | - | 1 | 161569815 | G | C | + |
| 1 | 161488295 | A | - | 1 | 161569951 | C | A | + |
| 1 | 161488297 | C | - | 1 | 161569953 | T | C | + |
| 1 | 161488455 | C | - | 1 | 161570107 | T | C | + |
| 1 | 161488539 | G | - | 1 | 161570191 | C | - | - |
| 1 | 161488551 | A | - | 1 | 161570203 | G | A | + |
| 1 | 161488557 | C | - | 1 | 161570209 | A | - | - |
| 1 | 161488602 | A | - | 1 | 161570253 | G | - | - |
| 1 | 161488706 | T | - | 1 | 161570357 | C | T | + |
| 1 | 161488928 | A | - | 1 | 161570579 | T | - | - |
| 1 | 161488943 | G | - | 1 | 161570594 | A | - | - |
| 1 | 161489010 | A | - | 1 | 161570661 | G | - | - |
| 1 | 161489012 | A | - | 1 | 161570663 | T | A | + |
| 1 | 161489029 | G | - | 1 | 161570680 | A | - | - |
| 1 | 161489081 | G | - | 1 | 161570732 | A | - | - |
| 1 | 161489133 | G | - | 1 | 161570784 | A | - | - |
| 1 | 161489149 | T | - | 1 | 161570800 | G | - | - |
| 1 | 161489152 | C | - | 1 | 161570803 | A | C | + |
| 1 | 161489173 | C | - | 1 | 161570824 | T | - | - |
| 1 | 161489198 | G | - | 1 | 161570849 | A | - | - |
| 1 | 161489472 | G | - | 1 | 161571123 | A | - | - |
| 1 | 161489485 | G | - | 1 | 161571136 | T | - | - |
| 1 | 161489523 | G | - | 1 | 161571174 | A | - | - |
| 1 | 161489576 | C | - | 1 | 161571227 | G | - | - |
| 1 | 161489590 | A | - | 1 | 161571241 | G | - | - |
| 1 | 161489600 | G | - | 1 | 161571251 | A | - | - |
| 1 | 161489603 | T | - | 1 | 161571254 | C | - | - |
| 1 | 161489628 | G | - | 1 | 161571279 | C | - | - |
| 1 | 161489645 | C | - | 1 | 161571296 | T | - | - |
| 1 | 161489654 | T | - | 1 | 161571305 | C | - | - |
| 1 | 161489960 | C | - | 1 | 161571611 | G | - | - |
| 1 | 161489969 | C | - | 1 | 161571620 | T | - | - |
| 1 | 161490004 | T | - | 1 | 161571655 | C | - | - |
| 1 | 161490040 | T | - | 1 | 161571691 | C | - | - |
| 1 | 161490098 | G | - | 1 | 161571749 | T | G | + |
| 1 | 161490291 | C | - | 1 | 161571942 | T | - | - |

|   |           |   |   |   |           |   |   |   |
|---|-----------|---|---|---|-----------|---|---|---|
| 1 | 161490470 | C | G | 1 | 161572121 | G | - | + |
| 1 | 161490533 | T | - | 1 | 161572184 | C | - | - |
| 1 | 161490607 | C | - | 1 | 161572256 | T | - | - |
| 1 | 161490615 | G | - | 1 | 161572264 | C | - | - |
| 1 | 161490639 | C | - | 1 | 161572288 | G | - | - |
| 1 | 161490652 | G | - | 1 | 161572301 | A | - | - |
| 1 | 161490707 | C | - | 1 | 161572356 | T | - | - |
| 1 | 161490896 | T | C | 1 | 161572545 | C | - | + |
| 1 | 161491030 | T | - | 1 | 161572679 | C | - | - |
| 1 | 161491097 | A | - | 1 | 161572746 | G | - | - |
| 1 | 161491104 | A | - | 1 | 161572753 | G | - | - |
| 1 | 161491111 | C | - | 1 | 161572760 | G | C | + |
| 1 | 161491128 | C | - | 1 | 161572777 | T | - | - |
| 1 | 161491289 | T | - | 1 | 161572938 | C | - | - |
| 1 | 161491319 | C | - | 1 | 161572968 | T | - | - |
| 1 | 161491322 | A | - | 1 | 161572971 | C | - | - |
| 1 | 161491351 | G | - | 1 | 161573000 | A | - | - |
| 1 | 161491363 | G | - | 1 | 161573012 | A | - | - |
| 1 | 161491645 | T | - | 1 | 161573295 | C | T | + |
| 1 | 161491732 | A | - | 1 | 161573382 | T | - | - |
| 1 | 161491736 | G | - | 1 | 161573386 | C | - | - |
| 1 | 161491768 | G | - | 1 | 161573418 | A | - | - |
| 1 | 161491789 | A | - | 1 | 161573439 | T | - | - |
| 1 | 161491857 | A | - | 1 | 161573507 | G | A | + |
| 1 | 161491872 | T | - | 1 | 161573522 | C | T | + |
| 1 | 161491904 | C | - | 1 | 161573554 | T | C | + |
| 1 | 161492028 | C | - | 1 | 161573678 | T | - | - |
| 1 | 161492035 | A | - | 1 | 161573685 | G | - | - |
| 1 | 161492050 | G | - | 1 | 161573700 | C | - | - |
| 1 | 161492139 | A | - | 1 | 161573789 | G | - | - |
| 1 | 161492151 | T | - | 1 | 161573801 | C | - | - |
| 1 | 161492157 | A | - | 1 | 161573807 | G | - | - |
| 1 | 161492298 | C | - | 1 | 161573948 | T | - | - |
| 1 | 161492364 | G | - | 1 | 161574014 | A | - | - |
| 1 | 161492380 | T | - | 1 | 161574030 | C | - | - |
| 1 | 161492387 | T | - | 1 | 161574037 | C | - | - |
| 1 | 161492448 | T | C | 1 | 161574098 | C | - | + |
| 1 | 161492522 | T | - | 1 | 161574172 | G | - | - |
| 1 | 161492588 | G | - | 1 | 161574238 | A | - | - |
| 1 | 161492610 | A | - | 1 | 161574259 | T | - | - |
| 1 | 161492644 | C | G | 1 | 161574293 | G | - | + |
| 1 | 161492656 | G | - | 1 | 161574305 | A | G | + |
| 1 | 161492667 | G | C | 1 | 161574316 | A | - | + |
| 1 | 161492767 | T | C | 1 | 161574416 | C | - | + |
| 1 | 161492817 | C | - | 1 | 161574466 | T | - | - |
| 1 | 161492882 | G | - | 1 | 161574535 | A | - | - |
| 1 | 161492954 | G | - | 1 | 161574607 | A | - | - |
| 1 | 161492975 | G | - | 1 | 161574628 | A | G | + |
| 1 | 161492997 | C | - | 1 | 161574650 | T | - | - |
| 1 | 161493009 | C | - | 1 | 161574662 | T | - | - |
| 1 | 161493014 | G | - | 1 | 161574667 | A | - | - |
| 1 | 161493025 | A | - | 1 | 161574678 | G | - | - |
| 1 | 161493044 | G | - | 1 | 161574697 | A | - | - |
| 1 | 161493098 | C | - | 1 | 161574751 | A | - | - |
| 1 | 161493162 | A | - | 1 | 161574815 | G | A | + |
| 1 | 161493170 | A | - | 1 | 161574823 | G | - | - |

|   |           |   |   |   |           |   |   |   |
|---|-----------|---|---|---|-----------|---|---|---|
| 1 | 161493281 | A | G | 1 | 161574934 | G | - | + |
| 1 | 161493305 | A | G | 1 | 161574958 | G | - | + |
| 1 | 161493395 | C | - | 1 | 161575048 | T | - | - |
| 1 | 161493404 | T | - | 1 | 161575057 | A | - | - |
| 1 | 161493444 | C | - | 1 | 161575097 | T | - | - |
| 1 | 161493545 | T | C | 1 | 161575194 | C | - | + |
| 1 | 161493546 | G | - | 1 | 161575195 | C | - | - |
| 1 | 161493557 | A | - | 1 | 161575206 | G | - | - |
| 1 | 161493630 | A | G | 1 | 161575279 | C | - | + |
| 1 | 161493631 | T | - | 1 | 161575280 | C | - | - |
| 1 | 161493632 | G | - | 1 | 161575281 | A | - | - |
| 1 | 161493634 | A | - | 1 | 161575283 | G | - | - |
| 1 | 161493635 | A | - | 1 | 161575284 | C | - | - |
| 1 | 161493649 | G | - | 1 | 161575298 | T | - | - |
| 1 | 161493655 | A | - | 1 | 161575304 | G | - | - |
| 1 | 161493658 | C | - | 1 | 161575307 | G | - | - |
| 1 | 161493673 | G | - | 1 | 161575322 | T | - | - |
| 1 | 161493676 | A | - | 1 | 161575325 | G | - | - |
| 1 | 161493685 | T | - | 1 | 161575334 | G | - | - |
| 1 | 161493695 | G | - | 1 | 161575344 | A | - | - |
| 1 | 161493696 | A | - | 1 | 161575345 | C | - | - |
| 1 | 161493710 | C | - | 1 | 161575359 | A | - | - |
| 1 | 161493715 | A | - | 1 | 161575364 | G | - | - |
| 1 | 161493716 | G | - | 1 | 161575365 | A | - | - |
| 1 | 161493717 | C | - | 1 | 161575366 | T | - | - |
| 1 | 161493718 | T | - | 1 | 161575367 | G | - | - |
| 1 | 161493724 | C | - | 1 | 161575373 | G | - | - |
| 1 | 161493732 | A | - | 1 | 161575381 | G | - | - |
| 1 | 161493734 | T | - | 1 | 161575383 | C | - | - |
| 1 | 161493735 | G | - | 1 | 161575384 | A | - | - |
| 1 | 161493748 | C | - | 1 | 161575397 | G | - | - |
| 1 | 161493750 | C | - | 1 | 161575399 | T | - | - |
| 1 | 161493766 | A | - | 1 | 161575415 | C | - | - |
| 1 | 161493767 | C | - | 1 | 161575416 | T | - | - |
| 1 | 161493775 | C | - | 1 | 161575424 | A | - | - |
| 1 | 161493783 | C | - | 1 | 161575432 | T | - | - |
| 1 | 161493795 | C | - | 1 | 161575444 | T | - | - |
| 1 | 161493841 | C | - | 1 | 161575490 | T | - | - |
| 1 | 161493844 | G | - | 1 | 161575493 | A | - | - |
| 1 | 161493941 | C | - | 1 | 161575590 | G | - | - |
| 1 | 161493944 | T | - | 1 | 161575593 | C | - | - |
| 1 | 161493945 | G | - | 1 | 161575594 | T | - | - |
| 1 | 161493946 | T | - | 1 | 161575595 | C | - | - |
| 1 | 161494046 | C | - | 1 | 161575695 | G | - | - |
| 1 | 161494070 | A | - | 1 | 161575719 | G | - | - |
| 1 | 161494111 | G | - | 1 | 161575761 | A | G | + |
| 1 | 161494127 | G | C | 1 | 161575777 | T | - | + |
| 1 | 161494135 | T | - | 1 | 161575785 | C | - | - |
| 1 | 161494137 | C | - | 1 | 161575787 | G | - | - |
| 1 | 161494145 | T | - | 1 | 161575795 | C | - | - |
| 1 | 161494178 | C | - | 1 | 161575828 | T | - | - |
| 1 | 161494184 | A | - | 1 | 161575834 | G | - | - |
| 1 | 161494194 | G | - | 1 | 161575844 | C | G | + |
| 1 | 161494211 | A | - | 1 | 161575861 | G | - | - |
| 1 | 161494221 | A | - | 1 | 161575875 | G | - | - |
| 1 | 161494292 | C | - | 1 | 161575924 | T | - | - |

|   |           |   |     |   |           |   |   |   |
|---|-----------|---|-----|---|-----------|---|---|---|
| 1 | 161494303 | A | -   | 1 | 161575935 | G | - | - |
| 1 | 161494311 | G | C   | 1 | 161575943 | C | - | + |
| 1 | 161494349 | T | -   | 1 | 161575981 | G | - | - |
| 1 | 161494732 | G | -   | 1 | 161576364 | A | - | - |
| 1 | 161494896 | G | -   | 1 | 161576528 | A | - | - |
| 1 | 161494906 | A | -   | 1 | 161576538 | G | - | - |
| 1 | 161494908 | G | -   | 1 | 161576540 | A | - | - |
| 1 | 161494958 | C | -   | 1 | 161576590 | G | - | - |
| 1 | 161494962 | T | -   | 1 | 161576594 | C | - | - |
| 1 | 161494966 | G | -   | 1 | 161576598 | C | G | + |
| 1 | 161494980 | C | -   | 1 | 161576612 | G | C | + |
| 1 | 161494991 | T | A   | 1 | 161576623 | A | T | + |
| 1 | 161495028 | G | -   | 1 | 161576660 | A | - | - |
| 1 | 161495096 | T | -   | 1 | 161576728 | C | - | - |
| 1 | 161495275 | T | -   | 1 | 161576907 | C | - | - |
| 1 | 161495338 | C | -   | 1 | 161576970 | A | - | - |
| 1 | 161495454 | G | -   | 1 | 161577086 | T | - | - |
| 1 | 161495464 | T | -   | 1 | 161577096 | G | - | - |
| 1 | 161495477 | A | T   | 1 | 161577110 | T | - | + |
| 1 | 161495788 | G | -   | 1 | 161577421 | T | - | - |
| 1 | 161495839 | G | -   | 1 | 161577472 | T | - | - |
| 1 | 161495860 | G | -   | 1 | 161577493 | A | - | - |
| 1 | 161495885 | T | C   | 1 | 161577518 | G | - | + |
| 1 | 161496030 | A | -   | 1 | 161577657 | G | A | + |
| 1 | 161496031 | A | -   | 1 | 161577658 | G | - | - |
| 1 | 161496162 | A | -   | 1 | 161577789 | G | - | - |
| 1 | 161496178 | G | A   | 1 | 161577805 | A | - | + |
| 1 | 161496321 | G | -   | 1 | 161577948 | A | - | - |
| 1 | 161496324 | A | -   | 1 | 161577951 | G | - | - |
| 1 | 161496334 | G | -   | 1 | 161577961 | A | - | - |
| 1 | 161496499 | C | -   | 1 | 161578139 | T | - | - |
| 1 | 161496530 | C | G   | 1 | 161578170 | G | - | + |
| 1 | 161496630 | C | -   | 1 | 161578270 | T | - | - |
| 1 | 161496642 | C | -   | 1 | 161578282 | T | - | - |
| 1 | 161496688 | G | -   | 1 | 161578328 | A | - | - |
| 1 | 161496708 | T | -   | 1 | 161578348 | C | - | - |
| 1 | 161496727 | G | -   | 1 | 161578367 | A | - | - |
| 1 | 161496742 | C | -   | 1 | 161578382 | A | - | - |
| 1 | 161496743 | C | -   | 1 | 161578383 | T | - | - |
| 1 | 161496818 | A | -   | 1 | 161578458 | G | - | - |
| 1 | 161496844 | A | -   | 1 | 161578484 | G | - | - |
| 1 | 161496856 | A | -   | 1 | 161578496 | G | - | - |
| 1 | 161496925 | C | -   | 1 | 161578563 | T | - | - |
| 1 | 161497377 | C | T   | 1 | 161579015 | T | - | + |
| 1 | 161497479 | T | -   | 1 | 161579121 | C | T | + |
| 1 | 161497501 | C | -   | 1 | 161579143 | T | C | + |
| 1 | 161497545 | T | -   | 1 | 161579187 | C | - | - |
| 1 | 161497546 | C | -   | 1 | 161579188 | T | - | - |
| 1 | 161497585 | C | T   | 1 | 161579227 | T | - | + |
| 1 | 161497955 | T | A/C | 1 | 161579597 | C | A | + |
| 1 | 161497962 | G | A   | 1 | 161579604 | A | - | + |
| 1 | 161497984 | C | G   | 1 | 161579626 | G | - | + |
| 1 | 161498002 | T | G   | 1 | 161579644 | G | - | + |
| 1 | 161498032 | T | C   | 1 | 161579674 | C | - | + |
| 1 | 161498045 | G | C   | 1 | 161579687 | C | G | + |
| 1 | 161498069 | A | G   | 1 | 161579711 | G | - | + |

|   |           |   |   |   |           |   |   |   |
|---|-----------|---|---|---|-----------|---|---|---|
| 1 | 161498127 | G | A | 1 | 161579769 | A | - | + |
| 1 | 161498302 | A | C | 1 | 161579944 | C | - | + |
| 1 | 161498348 | A | G | 1 | 161579990 | G | - | + |
| 1 | 161498351 | G | C | 1 | 161579993 | C | - | + |
| 1 | 161498352 | G | A | 1 | 161579994 | A | - | + |
| 1 | 161498371 | T | C | 1 | 161580013 | C | T | + |
| 1 | 161498474 | T | - | 1 | 161580116 | G | - | - |
| 1 | 161498515 | C | - | 1 | 161580157 | T | - | - |
| 1 | 161498604 | A | - | 1 | 161580245 | G | - | - |
| 1 | 161498704 | A | G | 1 | 161580345 | G | - | + |
| 1 | 161498717 | T | - | 1 | 161580358 | A | - | - |
| 1 | 161498742 | T | C | 1 | 161580383 | C | - | + |
| 1 | 161498752 | A | C | 1 | 161580393 | C | - | + |
| 1 | 161498778 | A | - | 1 | 161580419 | G | - | - |
| 1 | 161498839 | A | - | 1 | 161580480 | G | - | - |
| 1 | 161498858 | T | - | 1 | 161580499 | C | - | - |
| 1 | 161498893 | C | - | 1 | 161580534 | T | - | - |
| 1 | 161499228 | C | - | 1 | 161580868 | T | - | - |
| 1 | 161499391 | G | - | 1 | 161581009 | C | - | - |
| 1 | 161499396 | G | - | 1 | 161581014 | C | - | - |
| 1 | 161499434 | A | - | 1 | 161581045 | T | - | - |
| 1 | 161499435 | A | - | 1 | 161581046 | G | - | - |
| 1 | 161499436 | A | - | 1 | 161581047 | C | - | - |
| 1 | 161499578 | T | - | 1 | 161581189 | C | - | - |
| 1 | 161499580 | A | - | 1 | 161581191 | C | - | - |
| 1 | 161499586 | T | - | 1 | 161581197 | A | - | - |
| 1 | 161499589 | G | - | 1 | 161581200 | A | - | - |
| 1 | 161499592 | T | - | 1 | 161581203 | C | - | - |
| 1 | 161499615 | C | - | 1 | 161581226 | A | - | - |
| 1 | 161499623 | A | - | 1 | 161581234 | C | - | - |
| 1 | 161499677 | C | - | 1 | 161581282 | T | - | - |
| 1 | 161499764 | A | - | 1 | 161581368 | T | A | + |
| 1 | 161499906 | T | - | 1 | 161581510 | A | T | + |
| 1 | 161499928 | A | - | 1 | 161581532 | T | - | - |
| 1 | 161499972 | A | - | 1 | 161581576 | T | - | - |
| 1 | 161500024 | T | - | 1 | 161581628 | C | - | - |
| 1 | 161500034 | G | - | 1 | 161581638 | C | - | - |
| 1 | 161500118 | C | - | 1 | 161581722 | T | - | - |
| 1 | 161500127 | C | - | 1 | 161581731 | T | - | - |
| 1 | 161500129 | T | - | 1 | 161581733 | C | - | - |
| 1 | 161500130 | A | G | 1 | 161581734 | G | - | + |
| 1 | 161500137 | G | - | 1 | 161581741 | A | - | - |
| 1 | 161500138 | G | - | 1 | 161581742 | A | - | - |
| 1 | 161500165 | G | - | 1 | 161581769 | C | - | - |
| 1 | 161500170 | A | - | 1 | 161581774 | G | - | - |
| 1 | 161500171 | C | - | 1 | 161581775 | G | - | - |
| 1 | 161500177 | C | - | 1 | 161581781 | T | - | - |
| 1 | 161500178 | C | - | 1 | 161581782 | T | - | - |
| 1 | 161500198 | C | - | 1 | 161581803 | T | C | + |
| 1 | 161500218 | T | - | 1 | 161581823 | C | - | - |
| 1 | 161500224 | A | - | 1 | 161581829 | G | - | - |
| 1 | 161500226 | C | - | 1 | 161581831 | T | - | - |
| 1 | 161500228 | T | - | 1 | 161581833 | A | - | - |
| 1 | 161500229 | G | - | 1 | 161581834 | A | - | - |
| 1 | 161500364 | G | C | 1 | 161581969 | C | - | + |
| 1 | 161500405 | T | A | 1 | 161582010 | A | - | + |

|   |           |   |   |   |           |   |   |   |
|---|-----------|---|---|---|-----------|---|---|---|
| 1 | 161500604 | A | - | 1 | 161582209 | G | - | - |
| 1 | 161500608 | A | - | 1 | 161582213 | T | - | - |
| 1 | 161500615 | T | - | 1 | 161582220 | G | - | - |
| 1 | 161500650 | A | - | 1 | 161582255 | G | - | - |
| 1 | 161500699 | A | - | 1 | 161582304 | G | - | - |
| 1 | 161500711 | C | - | 1 | 161582316 | A | - | - |
| 1 | 161500712 | G | T | 1 | 161582317 | A | - | + |
| 1 | 161500736 | G | - | 1 | 161582341 | C | - | - |
| 1 | 161500746 | C | - | 1 | 161582351 | T | - | - |
| 1 | 161500757 | T | - | 1 | 161582362 | C | - | - |
| 1 | 161500797 | T | - | 1 | 161582402 | A | T | + |
| 1 | 161500880 | A | - | 1 | 161582485 | T | - | - |
| 1 | 161500888 | C | - | 1 | 161582493 | T | - | - |
| 1 | 161500900 | T | - | 1 | 161582505 | G | - | - |
| 1 | 161500914 | A | - | 1 | 161582519 | G | - | - |
| 1 | 161500927 | T | - | 1 | 161582532 | C | - | - |
| 1 | 161500937 | C | - | 1 | 161582542 | T | - | - |
| 1 | 161500947 | G | - | 1 | 161582552 | A | - | - |
| 1 | 161500950 | C | - | 1 | 161582555 | G | - | - |
| 1 | 161500967 | C | - | 1 | 161582572 | G | - | - |
| 1 | 161500968 | C | - | 1 | 161582573 | T | - | - |
| 1 | 161500976 | G | - | 1 | 161582580 | A | - | - |
| 1 | 161500977 | G | - | 1 | 161582581 | C | - | - |
| 1 | 161501005 | C | - | 1 | 161582609 | T | - | - |
| 1 | 161501011 | C | - | 1 | 161582615 | G | - | - |
| 1 | 161501014 | T | - | 1 | 161582618 | C | - | - |
| 1 | 161501016 | A | - | 1 | 161582620 | G | - | - |
| 1 | 161501019 | A | - | 1 | 161582623 | G | - | - |
| 1 | 161501023 | A | - | 1 | 161582627 | C | - | - |
| 1 | 161501024 | T | - | 1 | 161582628 | C | - | - |
| 1 | 161501026 | A | - | 1 | 161582630 | G | - | - |
| 1 | 161501039 | C | - | 1 | 161582643 | T | - | - |
| 1 | 161501151 | G | - | 1 | 161582731 | T | - | - |
| 1 | 161503119 | A | - | 1 | 161583063 | C | A | + |
| 1 | 161503149 | C | - | 1 | 161583096 | T | - | - |
| 1 | 161503179 | G | - | 1 | 161583125 | A | - | - |
| 1 | 161503199 | A | - | 1 | 161583145 | T | - | - |
| 1 | 161503234 | G | - | 1 | 161583180 | A | - | - |
| 1 | 161503790 | G | - | 1 | 161583736 | A | G | + |
| 1 | 161503916 | T | C | 1 | 161583862 | C | - | + |
| 1 | 161503943 | C | - | 1 | 161583889 | T | C | + |
| 1 | 161504002 | G | - | 1 | 161583948 | A | - | - |
| 1 | 161504461 | C | T | 1 | 161584407 | T | - | + |
| 1 | 161504560 | A | G | 1 | 161584506 | G | - | + |
| 1 | 161504857 | A | - | 1 | 161584803 | T | - | - |
| 1 | 161505074 | A | - | 1 | 161585023 | G | - | - |
| 1 | 161505146 | T | - | 1 | 161585095 | C | - | - |
| 1 | 161505172 | A | - | 1 | 161585121 | T | - | - |
| 1 | 161505177 | C | - | 1 | 161585126 | T | - | - |
| 1 | 161505240 | G | A | 1 | 161585189 | A | - | + |
| 1 | 161505278 | A | - | 1 | 161585227 | T | - | - |
| 1 | 161505380 | T | - | 1 | 161585329 | C | - | - |
| 1 | 161505394 | G | - | 1 | 161585343 | T | - | - |
| 1 | 161505397 | T | - | 1 | 161585346 | C | - | - |
| 1 | 161505471 | C | - | 1 | 161585420 | T | - | - |
| 1 | 161505478 | A | - | 1 | 161585427 | G | - | - |

|   |           |   |   |   |           |   |   |   |
|---|-----------|---|---|---|-----------|---|---|---|
| 1 | 161505483 | G | - | 1 | 161585432 | C | - | - |
| 1 | 161505507 | G | - | 1 | 161585456 | A | G | + |
| 1 | 161505593 | T | C | 1 | 161585542 | C | - | + |
| 1 | 161505600 | T | C | 1 | 161585549 | C | - | + |
| 1 | 161505677 | C | - | 1 | 161585626 | T | - | - |
| 1 | 161505768 | A | - | 1 | 161585717 | C | - | - |
| 1 | 161505780 | C | - | 1 | 161585729 | T | - | - |
| 1 | 161505870 | T | - | 1 | 161587294 | C | T | + |
| 1 | 161505882 | A | G | 1 | 161587306 | G | A | + |
| 1 | 161505883 | C | T | 1 | 161587307 | T | C | + |
| 1 | 161506025 | A | G | 1 | 161587449 | G | - | + |
| 1 | 161506226 | C | - | 1 | 161587650 | T | C | + |
| 1 | 161506227 | A | - | 1 | 161587651 | G | A | + |
| 1 | 161506468 | C | - | 1 | 161587892 | T | C | + |
| 1 | 161506517 | T | - | 1 | 161587942 | C | - | - |
| 1 | 161506535 | T | - | 1 | 161587960 | C | - | - |
| 1 | 161506578 | A | - | 1 | 161588003 | G | - | - |
| 1 | 161506655 | T | - | 1 | 161588080 | A | T | + |
| 1 | 161506709 | G | - | 1 | 161588134 | C | G | + |
| 1 | 161506781 | G | - | 1 | 161588206 | C | - | - |
| 1 | 161506791 | G | - | 1 | 161588216 | A | - | - |
| 1 | 161506832 | T | - | 1 | 161588257 | C | T | + |
| 1 | 161506888 | C | - | 1 | 161588313 | T | - | - |
| 1 | 161506917 | A | - | 1 | 161588342 | C | - | - |
| 1 | 161506923 | G | - | 1 | 161588348 | A | - | - |
| 1 | 161506954 | G | - | 1 | 161588379 | A | - | - |
| 1 | 161506965 | C | - | 1 | 161588390 | T | - | - |
| 1 | 161507069 | T | - | 1 | 161588494 | C | - | - |
| 1 | 161507100 | T | - | 1 | 161588525 | G | - | - |
| 1 | 161507204 | A | - | 1 | 161588629 | G | - | - |
| 1 | 161507242 | C | - | 1 | 161588667 | T | C | + |
| 1 | 161507256 | T | - | 1 | 161588681 | C | - | - |
| 1 | 161507293 | C | - | 1 | 161588718 | T | - | - |
| 1 | 161507466 | C | T | 1 | 161588891 | T | - | + |
| 1 | 161507504 | C | - | 1 | 161588929 | T | - | - |
| 1 | 161507506 | G | - | 1 | 161588931 | A | - | - |
| 1 | 161507666 | T | - | 1 | 161589091 | A | - | - |
| 1 | 161507832 | A | - | 1 | 161589257 | G | - | - |
| 1 | 161507923 | C | - | 1 | 161589348 | A | C | + |
| 1 | 161507924 | A | G | 1 | 161589349 | G | - | + |
| 1 | 161508030 | A | - | 1 | 161589453 | G | A | + |
| 1 | 161508039 | C | - | 1 | 161589462 | T | C | + |
| 1 | 161508040 | A | - | 1 | 161589463 | G | - | - |
| 1 | 161508056 | G | - | 1 | 161589479 | C | - | - |
| 1 | 161508065 | G | - | 1 | 161589488 | T | - | - |
| 1 | 161508073 | A | - | 1 | 161589496 | G | - | - |
| 1 | 161508087 | A | - | 1 | 161589510 | T | - | - |
| 1 | 161508117 | C | - | 1 | 161589540 | T | - | - |
| 1 | 161508137 | A | - | 1 | 161589560 | G | - | - |
| 1 | 161508139 | C | - | 1 | 161589562 | T | - | - |
| 1 | 161508160 | C | - | 1 | 161589583 | T | - | - |
| 1 | 161508176 | T | - | 1 | 161589599 | C | - | - |
| 1 | 161508181 | G | - | 1 | 161589604 | A | - | - |
| 1 | 161508197 | A | - | 1 | 161589620 | G | - | - |
| 1 | 161508226 | T | - | 1 | 161589649 | C | - | - |
| 1 | 161508228 | C | - | 1 | 161589651 | T | - | - |

|   |           |   |   |   |           |   |   |   |
|---|-----------|---|---|---|-----------|---|---|---|
| 1 | 161508229 | C | - | 1 | 161589652 | T | C | + |
| 1 | 161508231 | G | - | 1 | 161589654 | C | T | + |
| 1 | 161508271 | C | - | 1 | 161589694 | T | - | - |
| 1 | 161508320 | A | - | 1 | 161589743 | C | - | - |
| 1 | 161508383 | A | - | 1 | 161589807 | G | - | - |
| 1 | 161508428 | A | - | 1 | 161589852 | G | - | - |
| 1 | 161508430 | G | - | 1 | 161589854 | A | - | - |
| 1 | 161508433 | T | - | 1 | 161589857 | C | - | - |
| 1 | 161508436 | G | - | 1 | 161589860 | A | G | + |
| 1 | 161508458 | G | - | 1 | 161589882 | A | G | + |
| 1 | 161508548 | T | - | 1 | 161589974 | C | A | + |
| 1 | 161508552 | C | - | 1 | 161589978 | T | - | - |
| 1 | 161508556 | T | - | 1 | 161589982 | G | T | + |
| 1 | 161508562 | A | - | 1 | 161590010 | T | - | - |
| 1 | 161508569 | T | - | 1 | 161590017 | A | - | - |
| 1 | 161508574 | C | - | 1 | 161590028 | A | - | - |
| 1 | 161508583 | T | - | 1 | 161590037 | C | - | - |
| 1 | 161508617 | A | G | 1 | 161590071 | G | - | + |
| 1 | 161508651 | G | - | 1 | 161590105 | A | - | - |
| 1 | 161508677 | T | - | 1 | 161590131 | A | - | - |
| 1 | 161508678 | C | - | 1 | 161590132 | A | - | - |
| 1 | 161508754 | A | - | 1 | 161590208 | G | - | - |
| 1 | 161508761 | T | - | 1 | 161590215 | G | - | - |
| 1 | 161508763 | T | C | 1 | 161590217 | C | - | + |
| 1 | 161508771 | A | - | 1 | 161590225 | G | - | - |
| 1 | 161508788 | C | - | 1 | 161590242 | T | - | - |
| 1 | 161508807 | T | - | 1 | 161590261 | C | - | - |
| 1 | 161508842 | C | - | 1 | 161590296 | T | - | - |
| 1 | 161508859 | T | - | 1 | 161590313 | C | - | - |
| 1 | 161508862 | T | - | 1 | 161590316 | A | - | - |
| 1 | 161508871 | C | - | 1 | 161590325 | T | - | - |
| 1 | 161508949 | C | - | 1 | 161590403 | T | C | + |
| 1 | 161508977 | A | - | 1 | 161590431 | C | - | - |
| 1 | 161509035 | G | - | 1 | 161590489 | T | - | - |
| 1 | 161509040 | A | G | 1 | 161590494 | G | - | + |
| 1 | 161509049 | A | - | 1 | 161590503 | T | A | + |
| 1 | 161509060 | T | - | 1 | 161590514 | C | G | + |
| 1 | 161509064 | A | - | 1 | 161590519 | G | - | - |
| 1 | 161509106 | A | - | 1 | 161590560 | G | - | - |
| 1 | 161509126 | G | - | 1 | 161590580 | A | - | - |
| 1 | 161509141 | G | - | 1 | 161590595 | A | - | - |
| 1 | 161509192 | G | - | 1 | 161590650 | A | - | - |
| 1 | 161509227 | A | - | 1 | 161590685 | G | - | - |
| 1 | 161509286 | C | - | 1 | 161590718 | G | - | - |
| 1 | 161509311 | G | - | 1 | 161590743 | A | G | + |
| 1 | 161509357 | T | - | 1 | 161590789 | C | - | - |
| 1 | 161509400 | C | - | 1 | 161590832 | G | - | - |
| 1 | 161509491 | T | - | 1 | 161590923 | G | - | - |
| 1 | 161509502 | G | - | 1 | 161590934 | C | - | - |
| 1 | 161509569 | C | - | 1 | 161591001 | T | - | - |
| 1 | 161509626 | T | - | 1 | 161591058 | C | T | + |
| 1 | 161509632 | G | - | 1 | 161591064 | C | - | - |
| 1 | 161509636 | A | - | 1 | 161591068 | T | - | - |
| 1 | 161509711 | C | - | 1 | 161591143 | T | C | + |
| 1 | 161509743 | C | - | 1 | 161591175 | A | - | - |
| 1 | 161509744 | C | - | 1 | 161591176 | T | - | - |



|   |           |   |   |   |           |   |   |   |
|---|-----------|---|---|---|-----------|---|---|---|
| 1 | 161509794 | T | - | 1 | 161591226 | C | - | - |
| 1 | 161509809 | T | - | 1 | 161591241 | C | - | - |
| 1 | 161509817 | A | - | 1 | 161591249 | G | - | - |
| 1 | 161509870 | A | - | 1 | 161591302 | G | - | - |
| 1 | 161509898 | A | - | 1 | 161591330 | G | - | - |
| 1 | 161509953 | C | - | 1 | 161591385 | T | - | - |
| 1 | 161509958 | T | - | 1 | 161591390 | A | - | - |
| 1 | 161510015 | A | - | 1 | 161591449 | C | - | - |
| 1 | 161510017 | A | - | 1 | 161591451 | G | - | - |
| 1 | 161510018 | A | - | 1 | 161591452 | G | - | - |
| 1 | 161510033 | C | - | 1 | 161591467 | T | - | - |
| 1 | 161510039 | G | - | 1 | 161591473 | A | - | - |
| 1 | 161510044 | A | - | 1 | 161591478 | G | - | - |
| 1 | 161510057 | G | - | 1 | 161591491 | C | - | - |
| 1 | 161510070 | C | - | 1 | 161591504 | A | - | - |
| 1 | 161510089 | A | - | 1 | 161591523 | T | - | - |
| 1 | 161510098 | A | - | 1 | 161591532 | C | - | - |
| 1 | 161510104 | G | - | 1 | 161591538 | A | - | - |
| 1 | 161510111 | G | - | 1 | 161591545 | C | - | - |
| 1 | 161510125 | C | - | 1 | 161591560 | T | - | - |
| 1 | 161510128 | G | - | 1 | 161591563 | A | - | - |
| 1 | 161510143 | G | - | 1 | 161591578 | C | - | - |
| 1 | 161510155 | T | - | 1 | 161591591 | C | - | - |
| 1 | 161510174 | T | - | 1 | 161591610 | C | - | - |
| 1 | 161510186 | G | - | 1 | 161591622 | A | - | - |
| 1 | 161510195 | G | - | 1 | 161591631 | T | - | - |
| 1 | 161510223 | A | - | 1 | 161591659 | C | - | - |
| 1 | 161510228 | G | - | 1 | 161591664 | T | - | - |
| 1 | 161510230 | T | - | 1 | 161591666 | C | - | - |
| 1 | 161510235 | T | - | 1 | 161591671 | C | - | - |
| 1 | 161510239 | A | - | 1 | 161591675 | T | - | - |
| 1 | 161510358 | G | - | 1 | 161591794 | T | G | + |
| 1 | 161510434 | G | A | 1 | 161591870 | A | - | + |
| 1 | 161510530 | C | - | 1 | 161591966 | T | - | - |
| 1 | 161510534 | G | - | 1 | 161591970 | A | - | - |
| 1 | 161510543 | T | - | 1 | 161591979 | C | T | + |
| 1 | 161510648 | C | - | 1 | 161592084 | T | - | - |
| 1 | 161510672 | T | - | 1 | 161592109 | C | - | - |
| 1 | 161510676 | C | - | 1 | 161592113 | T | - | - |
| 1 | 161510680 | T | - | 1 | 161592117 | C | - | - |
| 1 | 161510689 | A | - | 1 | 161592126 | G | - | - |
| 1 | 161510723 | G | - | 1 | 161592160 | C | - | - |
| 1 | 161510753 | C | - | 1 | 161592190 | T | - | - |
| 1 | 161510806 | C | - | 1 | 161592243 | T | - | - |
| 1 | 161510907 | T | - | 1 | 161592344 | C | - | - |
| 1 | 161511222 | C | T | 1 | 161592659 | T | - | + |
| 1 | 161511400 | T | - | 1 | 161592837 | C | - | - |
| 1 | 161511414 | G | - | 1 | 161592851 | T | G | + |
| 1 | 161511449 | T | - | 1 | 161592886 | C | - | - |
| 1 | 161511471 | T | - | 1 | 161592908 | C | T | + |
| 1 | 161511581 | C | - | 1 | 161593018 | G | - | - |
| 1 | 161511649 | G | - | 1 | 161593086 | A | - | - |
| 1 | 161511652 | T | - | 1 | 161593089 | G | - | - |
| 1 | 161511739 | T | - | 1 | 161593176 | A | - | - |
| 1 | 161511759 | T | - | 1 | 161593196 | C | - | - |
| 1 | 161511761 | A | - | 1 | 161593198 | G | - | - |

|   |           |   |   |   |           |   |   |   |
|---|-----------|---|---|---|-----------|---|---|---|
| 1 | 161511763 | T | - | 1 | 161593200 | G | - | - |
| 1 | 161511772 | C | - | 1 | 161593209 | T | - | - |
| 1 | 161511840 | C | - | 1 | 161593277 | T | - | - |
| 1 | 161511848 | T | - | 1 | 161593285 | C | - | - |
| 1 | 161511853 | T | - | 1 | 161593290 | C | - | - |
| 1 | 161511912 | T | - | 1 | 161593349 | C | T | + |
| 1 | 161511960 | G | - | 1 | 161593397 | C | G | + |
| 1 | 161512029 | G | - | 1 | 161593468 | A | G | + |
| 1 | 161512082 | G | - | 1 | 161593520 | C | - | - |
| 1 | 161512155 | G | - | 1 | 161593592 | A | - | - |
| 1 | 161512348 | C | - | 1 | 161593786 | T | - | - |
| 1 | 161512379 | T | - | 1 | 161593817 | G | - | - |
| 1 | 161512416 | A | - | 1 | 161593854 | G | - | - |
| 1 | 161512430 | G | - | 1 | 161593868 | A | - | - |
| 1 | 161512440 | C | - | 1 | 161593880 | T | C | + |
| 1 | 161512465 | C | - | 1 | 161593905 | T | - | - |
| 1 | 161512534 | C | - | 1 | 161593974 | T | - | - |
| 1 | 161512658 | G | - | 1 | 161594098 | A | - | - |
| 1 | 161512674 | G | - | 1 | 161594114 | A | - | - |
| 1 | 161512771 | T | - | 1 | 161594211 | C | - | - |
| 1 | 161512806 | T | - | 1 | 161594246 | G | T | + |
| 1 | 161512834 | A | - | 1 | 161594274 | G | - | - |
| 1 | 161512867 | G | - | 1 | 161594307 | A | - | - |
| 1 | 161512959 | A | - | 1 | 161594399 | G | - | - |
| 1 | 161513072 | A | - | 1 | 161594512 | G | - | - |
| 1 | 161513085 | C | - | 1 | 161594525 | G | - | - |
| 1 | 161513086 | A | - | 1 | 161594526 | T | - | - |
| 1 | 161513118 | A | - | 1 | 161594558 | G | A | + |
| 1 | 161513198 | G | - | 1 | 161594638 | T | - | - |
| 1 | 161513321 | C | - | 1 | 161594761 | T | C | + |
| 1 | 161513406 | T | - | 1 | 161594844 | A | - | - |
| 1 | 161513554 | A | - | 1 | 161594997 | G | A | + |
| 1 | 161513703 | C | - | 1 | 161595146 | T | - | - |
| 1 | 161513704 | A | - | 1 | 161595147 | G | - | - |
| 1 | 161513759 | G | C | 1 | 161595202 | C | G | + |
| 1 | 161513822 | A | - | 1 | 161595265 | G | - | - |
| 1 | 161513907 | A | G | 1 | 161595351 | G | - | + |
| 1 | 161514197 | C | - | 1 | 161595641 | G | - | - |
| 1 | 161514436 | T | - | 1 | 161595880 | G | - | - |
| 1 | 161514542 | A | C | 1 | 161595986 | C | - | + |
| 1 | 161514570 | G | - | 1 | 161596014 | A | G | + |
| 1 | 161514596 | A | - | 1 | 161596040 | G | - | - |
| 1 | 161514628 | C | - | 1 | 161596072 | T | - | - |
| 1 | 161514837 | A | - | 1 | 161596283 | G | A | + |
| 1 | 161515138 | A | - | 1 | 161596584 | G | - | - |
| 1 | 161515143 | C | - | 1 | 161596589 | T | - | - |
| 1 | 161515212 | A | - | 1 | 161596658 | C | - | - |
| 1 | 161515213 | G | - | 1 | 161596659 | T | - | - |
| 1 | 161515225 | G | - | 1 | 161596671 | C | - | - |
| 1 | 161515233 | G | - | 1 | 161596679 | C | - | - |
| 1 | 161515239 | G | - | 1 | 161596685 | A | - | - |
| 1 | 161515281 | C | - | 1 | 161596731 | T | - | - |
| 1 | 161515287 | A | - | 1 | 161596737 | T | - | - |
| 1 | 161515290 | G | - | 1 | 161596740 | C | - | - |
| 1 | 161515308 | T | - | 1 | 161596758 | G | - | - |
| 1 | 161515316 | C | - | 1 | 161596766 | A | - | - |

|   |           |   |   |   |           |   |   |   |
|---|-----------|---|---|---|-----------|---|---|---|
| 1 | 161515317 | C | - | 1 | 161596767 | G | - | - |
| 1 | 161515503 | G | - | 1 | 161596877 | A | - | - |
| 1 | 161515563 | G | - | 1 | 161596937 | T | - | - |
| 1 | 161515638 | T | G | 1 | 161597013 | G | - | + |
| 1 | 161515748 | T | - | 1 | 161597123 | C | - | - |
| 1 | 161515749 | G | - | 1 | 161597124 | A | - | - |
| 1 | 161515803 | C | - | 1 | 161597178 | G | - | - |
| 1 | 161515807 | T | - | 1 | 161597182 | C | - | - |
| 1 | 161515824 | A | - | 1 | 161597192 | G | - | - |
| 1 | 161515831 | A | - | 1 | 161597199 | T | - | - |
| 1 | 161515840 | A | - | 1 | 161597208 | T | - | - |
| 1 | 161515841 | A | - | 1 | 161597209 | G | - | - |
| 1 | 161515872 | C | - | 1 | 161597240 | G | - | - |
| 1 | 161515890 | A | - | 1 | 161597258 | T | - | - |
| 1 | 161515952 | C | A | 1 | 161597320 | A | - | + |
| 1 | 161516054 | G | - | 1 | 161597422 | A | - | - |
| 1 | 161516135 | A | - | 1 | 161597503 | G | - | - |
| 1 | 161516149 | C | - | 1 | 161597517 | T | - | - |
| 1 | 161516159 | T | - | 1 | 161597527 | C | - | - |
| 1 | 161516164 | A | - | 1 | 161597532 | G | - | - |
| 1 | 161516277 | T | - | 1 | 161597645 | C | - | - |
| 1 | 161516327 | A | - | 1 | 161597695 | G | - | - |
| 1 | 161516365 | T | - | 1 | 161597733 | C | - | - |
| 1 | 161516461 | C | - | 1 | 161597829 | T | - | - |
| 1 | 161516464 | G | - | 1 | 161597832 | A | - | - |
| 1 | 161516467 | G | - | 1 | 161597835 | A | - | - |
| 1 | 161516477 | T | - | 1 | 161597845 | C | - | - |
| 1 | 161516480 | A | - | 1 | 161597848 | G | - | - |
| 1 | 161516509 | C | - | 1 | 161597877 | T | - | - |
| 1 | 161516512 | T | - | 1 | 161597880 | C | - | - |
| 1 | 161516514 | C | - | 1 | 161597882 | T | - | - |
| 1 | 161516585 | C | - | 1 | 161597953 | G | - | - |
| 1 | 161516598 | G | - | 1 | 161597966 | A | - | - |
| 1 | 161516609 | T | - | 1 | 161597977 | C | - | - |
| 1 | 161516613 | T | - | 1 | 161597981 | G | - | - |
| 1 | 161516619 | C | - | 1 | 161597987 | A | C | + |
| 1 | 161516641 | G | - | 1 | 161598009 | A | - | - |
| 1 | 161516684 | G | - | 1 | 161598052 | A | - | - |
| 1 | 161516734 | A | - | 1 | 161598092 | C | - | - |
| 1 | 161516748 | A | - | 1 | 161598106 | G | - | - |
| 1 | 161516791 | T | - | 1 | 161598149 | A | - | - |
| 1 | 161516915 | T | - | 1 | 161598273 | C | - | - |
| 1 | 161517008 | T | - | 1 | 161598366 | C | - | - |
| 1 | 161517054 | C | - | 1 | 161598412 | A | C | + |
| 1 | 161517201 | G | - | 1 | 161598559 | A | - | - |
| 1 | 161517234 | C | - | 1 | 161598592 | G | C | + |
| 1 | 161517271 | T | - | 1 | 161598629 | C | - | - |
| 1 | 161517306 | C | - | 1 | 161598664 | T | C | + |
| 1 | 161517334 | A | - | 1 | 161598692 | G | A | + |
| 1 | 161517465 | G | - | 1 | 161598823 | T | G | + |
| 1 | 161517571 | T | - | 1 | 161598929 | A | T | + |
| 1 | 161517620 | G | - | 1 | 161598978 | A | G | + |
| 1 | 161517629 | G | - | 1 | 161598987 | A | G | + |
| 1 | 161517631 | T | - | 1 | 161598989 | C | T | + |
| 1 | 161517766 | A | - | 1 | 161599124 | T | A | + |
| 1 | 161517810 | G | - | 1 | 161599168 | C | G | + |

|   |           |   |   |   |           |   |     |   |
|---|-----------|---|---|---|-----------|---|-----|---|
| 1 | 161517842 | C | G | 1 | 161599200 | G | C   | + |
| 1 | 161517894 | T | - | 1 | 161599252 | A | T   | + |
| 1 | 161518286 | C | - | 1 | 161599643 | T | C   | + |
| 1 | 161518336 | C | - | 1 | 161599693 | T | C   | + |
| 1 | 161518416 | G | - | 1 | 161599773 | A | G   | + |
| 1 | 161518422 | C | - | 1 | 161599779 | G | C   | + |
| 1 | 161518747 | T | - | 1 | 161600104 | A | -   | - |
| 1 | 161519158 | G | - | 1 | 161600516 | A | -   | - |
| 1 | 161519163 | T | - | 1 | 161600521 | C | T   | + |
| 1 | 161519243 | G | - | 1 | 161600601 | T | -   | - |
| 1 | 161519291 | G | - | 1 | 161600649 | C | G   | + |
| 1 | 161519296 | C | - | 1 | 161600654 | A | -   | - |
| 1 | 161519349 | A | - | 1 | 161600707 | G | -   | - |
| 1 | 161519351 | G | - | 1 | 161600709 | T | -   | - |
| 1 | 161519396 | C | - | 1 | 161600754 | T | -   | - |
| 1 | 161519429 | C | - | 1 | 161600787 | G | C   | + |
| 1 | 161519434 | C | - | 1 | 161600792 | A | C   | + |
| 1 | 161519476 | C | - | 1 | 161600834 | T | -   | - |
| 1 | 161519584 | A | - | 1 | 161600942 | G | -   | - |
| 1 | 161519601 | A | - | 1 | 161600959 | G | -   | - |
| 1 | 161519622 | C | - | 1 | 161600980 | T | -   | - |
| 1 | 161519645 | C | - | 1 | 161601003 | T | -   | - |
| 1 | 161519646 | A | - | 1 | 161601004 | G | -   | - |
| 1 | 161519650 | A | - | 1 | 161601008 | G | -   | - |
| 1 | 161519677 | C | - | 1 | 161601035 | T | -   | - |
| 1 | 161519684 | G | - | 1 | 161601042 | A | -   | - |
| 1 | 161519695 | G | - | 1 | 161601053 | C | -   | - |
| 1 | 161519700 | G | - | 1 | 161601058 | T | -   | - |
| 1 | 161519723 | C | - | 1 | 161601081 | A | -   | - |
| 1 | 161519724 | C | - | 1 | 161601082 | T | -   | - |
| 1 | 161519760 | C | - | 1 | 161601118 | G | C   | + |
| 1 | 161519775 | C | - | 1 | 161601133 | T | C   | + |
| 1 | 161519777 | T | - | 1 | 161601135 | C | -   | - |
| 1 | 161519788 | T | - | 1 | 161601146 | C | -   | - |
| 1 | 161519839 | C | - | 1 | 161601197 | T | -   | - |
| 1 | 161519840 | A | - | 1 | 161601198 | T | -   | - |
| 1 | 161519872 | G | - | 1 | 161601231 | A | G   | + |
| 1 | 161519901 | T | - | 1 | 161601260 | C | -   | - |
| 1 | 161519902 | G | - | 1 | 161601261 | A | -   | - |
| 1 | 161519955 | T | - | 1 | 161601314 | G | -   | - |
| 1 | 161519974 | G | - | 1 | 161601333 | C | -   | - |
| 1 | 161519991 | C | - | 1 | 161601350 | T | C   | + |
| 1 | 161520013 | T | - | 1 | 161601372 | C | -   | - |
| 1 | 161520039 | G | - | 1 | 161601398 | T | G   | + |
| 1 | 161520056 | A | - | 1 | 161601414 | T | A   | + |
| 1 | 161520257 | C | - | 1 | 161601612 | T | -   | - |
| 1 | 161520301 | C | - | 1 | 161601656 | T | C   | + |
| 1 | 161520403 | G | - | 1 | 161601758 | T | G   | + |
| 1 | 161520406 | G | - | 1 | 161601761 | A | -   | - |
| 1 | 161520509 | C | - | 1 | 161601872 | T | C   | + |
| 1 | 161520616 | C | - | 1 | 161601979 | T | C   | + |
| 1 | 161520863 | C | - | 1 | 161602226 | T | C   | + |
| 1 | 161520919 | T | - | 1 | 161602282 | C | -   | - |
| 1 | 161520920 | G | - | 1 | 161602283 | A | G   | + |
| 1 | 161520936 | A | - | 1 | 161602299 | C | A/T | + |
| 1 | 161521007 | A | - | 1 | 161602370 | G | -   | - |

|   |           |   |   |   |           |   |   |   |
|---|-----------|---|---|---|-----------|---|---|---|
| 1 | 161521030 | G | - | 1 | 161602393 | A | - | - |
| 1 | 161521037 | T | - | 1 | 161602400 | C | - | - |
| 1 | 161521235 | G | - | 1 | 161602598 | A | G | + |
| 1 | 161521382 | A | - | 1 | 161602745 | G | - | - |
| 1 | 161521399 | A | - | 1 | 161602762 | G | - | - |
| 1 | 161521403 | C | - | 1 | 161602766 | G | - | - |
| 1 | 161521618 | C | - | 1 | 161602981 | T | C | + |
| 1 | 161521748 | A | - | 1 | 161603111 | G | - | - |
| 1 | 161521795 | T | - | 1 | 161603157 | C | - | - |
| 1 | 161521922 | T | - | 1 | 161603284 | C | - | - |
| 1 | 161522308 | G | - | 1 | 161603670 | T | G | + |
| 1 | 161522476 | A | - | 1 | 161603838 | G | - | - |
| 1 | 161522544 | A | - | 1 | 161603906 | G | - | - |
| 1 | 161522552 | A | - | 1 | 161603914 | C | - | - |
| 1 | 161522620 | G | C | 1 | 161603982 | C | G | + |
| 1 | 161522883 | G | - | 1 | 161604245 | A | - | - |
| 1 | 161523139 | G | - | 1 | 161604501 | A | G | + |
| 1 | 161523660 | G | - | 1 | 161605022 | A | - | - |
| 1 | 161523666 | G | - | 1 | 161605028 | C | - | - |
| 1 | 161523684 | A | - | 1 | 161605045 | T | - | - |
| 1 | 161523819 | A | - | 1 | 161605179 | T | - | - |
| 1 | 161523830 | C | - | 1 | 161605190 | G | C | + |
| 1 | 161523936 | T | - | 1 | 161605296 | C | T | + |
| 1 | 161524053 | T | G | 1 | 161605413 | G | - | + |
| 1 | 161524073 | G | - | 1 | 161605433 | A | G | + |
| 1 | 161524094 | C | - | 1 | 161605454 | T | C | + |
| 1 | 161524203 | G | - | 1 | 161605563 | A | G | + |
| 1 | 161524297 | A | G | 1 | 161605657 | G | A | + |
| 1 | 161524328 | G | - | 1 | 161605688 | A | G | + |
| 1 | 161524462 | A | - | 1 | 161605822 | G | A | + |
| 1 | 161524485 | T | - | 1 | 161605845 | G | - | - |
| 1 | 161524490 | A | - | 1 | 161605850 | T | - | - |
| 1 | 161524491 | A | - | 1 | 161605851 | T | - | - |
| 1 | 161524492 | A | - | 1 | 161605852 | T | - | - |
| 1 | 161524530 | A | - | 1 | 161605889 | G | A | + |
| 1 | 161524705 | T | - | 1 | 161606064 | A | T | + |
| 1 | 161524789 | C | G | 1 | 161606148 | G | C | + |
| 1 | 161524817 | C | - | 1 | 161606176 | T | - | - |
| 1 | 161524819 | T | - | 1 | 161606178 | G | - | - |
| 1 | 161524942 | G | - | 1 | 161606301 | A | G | + |
| 1 | 161525008 | T | - | 1 | 161606367 | C | T | + |
| 1 | 161525030 | C | - | 1 | 161606389 | T | - | - |
| 1 | 161525276 | A | - | 1 | 161606635 | G | A | + |
| 1 | 161525572 | A | - | 1 | 161606931 | T | - | - |
| 1 | 161525598 | T | - | 1 | 161606957 | C | - | - |
| 1 | 161525615 | G | - | 1 | 161606973 | A | G | + |
| 1 | 161525685 | C | - | 1 | 161607043 | T | - | - |
| 1 | 161525721 | G | - | 1 | 161607079 | A | - | - |
| 1 | 161525792 | A | - | 1 | 161607150 | G | - | - |
| 1 | 161525890 | T | - | 1 | 161607248 | C | - | - |
| 1 | 161526019 | G | - | 1 | 161607377 | A | - | - |
| 1 | 161526046 | A | - | 1 | 161607404 | G | - | - |
| 1 | 161526049 | T | - | 1 | 161607407 | C | - | - |
| 1 | 161526053 | G | - | 1 | 161607411 | C | - | - |
| 1 | 161526066 | G | - | 1 | 161607424 | A | - | - |
| 1 | 161526069 | G | - | 1 | 161607427 | A | - | - |

|   |           |   |   |   |           |   |   |   |
|---|-----------|---|---|---|-----------|---|---|---|
| 1 | 161526072 | C | - | 1 | 161607430 | G | - | - |
| 1 | 161526086 | G | - | 1 | 161607444 | T | - | - |
| 1 | 161526102 | A | - | 1 | 161607460 | G | - | - |
| 1 | 161526160 | G | - | 1 | 161607518 | A | - | - |
| 1 | 161526183 | A | - | 1 | 161607541 | G | - | - |
| 1 | 161526279 | G | - | 1 | 161607637 | A | - | - |
| 1 | 161526287 | A | - | 1 | 161607645 | G | - | - |
| 1 | 161526345 | A | - | 1 | 161607703 | G | - | - |
| 1 | 161526524 | T | - | 1 | 161607874 | C | - | - |
| 1 | 161526789 | T | - | 1 | 161608139 | C | T | + |
| 1 | 161526809 | T | - | 1 | 161608159 | C | - | - |
| 1 | 161526888 | T | C | 1 | 161608238 | C | - | + |
| 1 | 161527018 | G | - | 1 | 161608368 | A | - | - |
| 1 | 161527019 | G | - | 1 | 161608369 | A | - | - |
| 1 | 161527043 | A | - | 1 | 161608393 | G | - | - |
| 1 | 161527131 | C | - | 1 | 161608481 | T | - | - |
| 1 | 161527133 | C | - | 1 | 161608483 | G | - | - |
| 1 | 161527138 | A | - | 1 | 161608488 | G | - | - |
| 1 | 161527159 | C | - | 1 | 161608509 | T | - | - |
| 1 | 161527469 | G | - | 1 | 161608819 | A | G | + |
| 1 | 161527772 | G | - | 1 | 161609122 | A | G | + |
| 1 | 161527836 | T | G | 1 | 161609186 | G | T | + |
| 1 | 161527901 | C | T | 1 | 161609251 | T | C | + |
| 1 | 161528050 | A | - | 1 | 161609400 | G | A | + |
| 1 | 161528057 | C | - | 1 | 161609407 | A | C | + |
| 1 | 161528066 | T | G | 1 | 161609416 | G | T | + |
| 1 | 161528119 | T | C | 1 | 161609469 | C | T | + |
| 1 | 161528344 | G | T | 1 | 161609693 | T | G | + |
| 1 | 161528577 | G | - | 1 | 161609926 | A | G | + |
| 1 | 161529191 | T | A | 1 | 161610539 | A | T | + |
| 1 | 161529193 | G | - | 1 | 161610541 | A | G | + |
| 1 | 161529194 | C | - | 1 | 161610542 | T | C | + |
| 1 | 161529386 | A | - | 1 | 161610734 | G | A | + |
| 1 | 161529400 | C | - | 1 | 161610748 | T | - | - |
| 1 | 161529471 | C | - | 1 | 161610819 | A | C | + |
| 1 | 161529520 | G | - | 1 | 161610868 | A | - | - |
| 1 | 161529619 | C | - | 1 | 161610967 | T | - | - |
| 1 | 161529645 | T | - | 1 | 161610993 | C | - | - |
| 1 | 161529925 | G | - | 1 | 161611270 | A | G | + |
| 1 | 161530113 | A | - | 1 | 161611458 | G | A | + |
| 1 | 161530222 | A | T | 1 | 161611567 | T | A | + |
| 1 | 161530775 | A | - | 1 | 161612120 | C | - | - |
| 1 | 161530808 | T | - | 1 | 161612153 | A | - | - |
| 1 | 161530834 | A | - | 1 | 161612179 | G | - | - |
| 1 | 161530869 | G | A | 1 | 161612214 | A | - | + |
| 1 | 161531030 | T | G | 1 | 161612375 | G | - | + |
| 1 | 161531031 | T | G | 1 | 161612376 | G | - | + |
| 1 | 161531033 | T | G | 1 | 161612378 | G | - | + |
| 1 | 161531065 | T | C | 1 | 161612410 | C | T | + |
| 1 | 161531084 | T | - | 1 | 161612429 | C | - | - |
| 1 | 161531233 | C | - | 1 | 161612578 | T | C | + |
| 1 | 161531265 | G | - | 1 | 161612610 | A | - | - |
| 1 | 161531270 | G | - | 1 | 161612615 | A | - | - |
| 1 | 161531305 | G | - | 1 | 161612650 | A | - | - |
| 1 | 161531337 | C | - | 1 | 161612682 | T | - | - |
| 1 | 161531407 | A | - | 1 | 161612752 | G | - | - |

|   |           |   |   |   |           |   |   |   |
|---|-----------|---|---|---|-----------|---|---|---|
| 1 | 161531505 | G | - | 1 | 161612850 | A | - | - |
| 1 | 161531782 | G | - | 1 | 161613128 | A | - | - |
| 1 | 161532028 | A | T | 1 | 161613374 | T | - | + |
| 1 | 161532045 | C | - | 1 | 161613391 | G | - | - |
| 1 | 161532046 | T | - | 1 | 161613392 | C | - | - |
| 1 | 161532053 | T | C | 1 | 161613399 | C | - | + |
| 1 | 161532057 | T | A | 1 | 161613403 | A | - | + |
| 1 | 161532073 | G | T | 1 | 161613419 | T | - | + |
| 1 | 161532089 | A | C | 1 | 161613435 | C | - | + |
| 1 | 161532209 | G | A | 1 | 161613555 | A | - | + |
| 1 | 161532296 | A | - | 1 | 161613642 | T | - | - |
| 1 | 161532477 | A | G | 1 | 161613823 | G | A | + |
| 1 | 161532616 | C | - | 1 | 161613962 | T | C | + |
| 1 | 161532643 | C | - | 1 | 161613989 | T | - | - |
| 1 | 161532669 | C | - | 1 | 161614015 | T | - | - |
| 1 | 161532781 | A | T | 1 | 161614127 | T | - | + |
| 1 | 161533016 | G | - | 1 | 161614362 | A | - | - |
| 1 | 161533088 | C | - | 1 | 161614434 | T | - | - |
| 1 | 161533106 | G | - | 1 | 161614452 | A | - | - |
| 1 | 161533144 | G | - | 1 | 161614490 | T | G | + |
| 1 | 161533216 | G | - | 1 | 161614562 | A | - | - |
| 1 | 161533280 | A | - | 1 | 161614626 | T | - | - |
| 1 | 161533286 | C | - | 1 | 161614632 | T | - | - |
| 1 | 161533389 | T | - | 1 | 161614735 | C | - | - |
| 1 | 161533475 | A | - | 1 | 161614821 | G | - | - |
| 1 | 161533523 | A | - | 1 | 161614869 | G | - | - |
| 1 | 161533672 | A | - | 1 | 161615018 | G | - | - |
| 1 | 161533792 | T | - | 1 | 161615139 | C | - | - |
| 1 | 161533799 | G | - | 1 | 161615146 | T | - | - |
| 1 | 161533801 | G | - | 1 | 161615148 | C | - | - |
| 1 | 161533835 | T | - | 1 | 161615182 | C | - | - |
| 1 | 161533864 | C | - | 1 | 161615198 | T | - | - |
| 1 | 161533919 | C | - | 1 | 161615253 | A | - | - |
| 1 | 161533925 | T | - | 1 | 161615259 | C | - | - |
| 1 | 161533949 | C | - | 1 | 161615283 | A | - | - |
| 1 | 161533978 | G | - | 1 | 161615312 | A | - | - |
| 1 | 161533989 | A | - | 1 | 161615323 | G | - | - |
| 1 | 161534026 | A | - | 1 | 161615360 | G | - | - |
| 1 | 161534031 | G | - | 1 | 161615365 | A | - | - |
| 1 | 161534040 | C | - | 1 | 161615374 | G | - | - |
| 1 | 161534048 | G | - | 1 | 161615382 | A | - | - |
| 1 | 161534076 | C | - | 1 | 161615410 | T | - | - |
| 1 | 161534135 | G | - | 1 | 161615525 | T | - | - |
| 1 | 161534156 | G | - | 1 | 161615546 | A | - | - |
| 1 | 161534316 | C | - | 1 | 161615706 | T | - | - |
| 1 | 161534344 | A | - | 1 | 161615734 | G | - | - |
| 1 | 161534587 | G | - | 1 | 161615977 | A | - | - |
| 1 | 161534608 | G | - | 1 | 161615998 | T | G | + |
| 1 | 161534875 | G | - | 1 | 161616265 | A | - | - |
| 1 | 161534881 | T | - | 1 | 161616271 | C | - | - |
| 1 | 161534945 | C | - | 1 | 161616335 | T | C | + |
| 1 | 161535009 | T | - | 1 | 161616399 | G | T | + |
| 1 | 161535071 | G | - | 1 | 161616461 | A | - | - |
| 1 | 161535384 | A | C | 1 | 161616775 | C | - | + |
| 1 | 161535486 | C | - | 1 | 161616877 | T | - | - |
| 1 | 161535683 | C | - | 1 | 161617074 | T | - | - |

|   |           |   |   |   |           |   |   |   |
|---|-----------|---|---|---|-----------|---|---|---|
| 1 | 161535725 | C | - | 1 | 161617112 | T | - | - |
| 1 | 161535726 | G | - | 1 | 161617113 | T | G | + |
| 1 | 161535734 | C | - | 1 | 161617121 | G | - | - |
| 1 | 161535742 | G | - | 1 | 161617130 | A | - | - |
| 1 | 161535761 | G | - | 1 | 161617149 | A | - | - |
| 1 | 161535763 | C | - | 1 | 161617151 | T | - | - |
| 1 | 161535765 | G | - | 1 | 161617153 | T | - | - |
| 1 | 161535769 | C | - | 1 | 161617157 | T | - | - |
| 1 | 161535784 | G | - | 1 | 161617172 | C | - | - |
| 1 | 161535786 | T | - | 1 | 161617174 | C | - | - |
| 1 | 161535793 | C | - | 1 | 161617181 | G | - | - |
| 1 | 161535803 | C | - | 1 | 161617191 | A | - | - |
| 1 | 161535806 | C | - | 1 | 161617194 | A | - | - |
| 1 | 161535827 | C | - | 1 | 161617215 | T | - | - |
| 1 | 161535828 | A | - | 1 | 161617216 | G | - | - |
| 1 | 161535848 | G | - | 1 | 161617236 | A | - | - |
| 1 | 161535852 | G | - | 1 | 161617240 | A | - | - |
| 1 | 161535856 | C | - | 1 | 161617244 | G | - | - |
| 1 | 161535857 | T | - | 1 | 161617245 | C | - | - |
| 1 | 161535859 | C | - | 1 | 161617247 | T | - | - |
| 1 | 161535865 | G | - | 1 | 161617253 | T | - | - |
| 1 | 161535879 | T | - | 1 | 161617266 | C | - | - |
| 1 | 161535889 | A | - | 1 | 161617276 | G | - | - |
| 1 | 161535893 | G | - | 1 | 161617280 | A | - | - |
| 1 | 161535900 | C | - | 1 | 161617287 | T | - | - |
| 1 | 161535901 | A | - | 1 | 161617288 | G | - | - |
| 1 | 161535904 | G | - | 1 | 161617291 | A | - | - |
| 1 | 161535906 | T | - | 1 | 161617293 | G | - | - |
| 1 | 161535909 | A | - | 1 | 161617296 | G | - | - |
| 1 | 161535913 | G | - | 1 | 161617300 | A | - | - |
| 1 | 161535916 | A | - | 1 | 161617303 | C | - | - |
| 1 | 161535923 | C | - | 1 | 161617310 | T | - | - |
| 1 | 161535926 | T | - | 1 | 161617313 | A | - | - |
| 1 | 161535945 | G | - | 1 | 161617338 | C | - | - |
| 1 | 161535946 | C | - | 1 | 161617339 | A | - | - |
| 1 | 161535961 | C | - | 1 | 161617354 | T | - | - |
| 1 | 161535970 | G | - | 1 | 161617363 | A | - | - |
| 1 | 161535972 | G | - | 1 | 161617365 | C | - | - |
| 1 | 161535977 | C | - | 1 | 161617370 | G | - | - |
| 1 | 161535981 | C | - | 1 | 161617374 | T | - | - |
| 1 | 161536019 | C | - | 1 | 161617412 | T | - | - |
| 1 | 161536050 | G | - | 1 | 161617443 | C | - | - |
| 1 | 161536104 | T | - | 1 | 161617497 | C | T | + |
| 1 | 161536124 | C | - | 1 | 161617517 | T | - | - |
| 1 | 161536126 | C | - | 1 | 161617519 | T | - | - |
| 1 | 161536197 | C | - | 1 | 161617590 | T | - | - |
| 1 | 161536225 | C | - | 1 | 161617618 | T | - | - |
| 1 | 161536287 | T | - | 1 | 161617680 | C | - | - |
| 1 | 161536335 | T | - | 1 | 161617728 | C | - | - |
| 1 | 161536340 | C | - | 1 | 161617733 | G | - | - |
| 1 | 161536361 | T | - | 1 | 161617754 | C | - | - |
| 1 | 161536427 | C | - | 1 | 161617820 | G | C | + |
| 1 | 161536499 | G | - | 1 | 161617892 | A | - | - |
| 1 | 161536937 | T | - | 1 | 161618330 | G | - | - |
| 1 | 161536958 | G | - | 1 | 161618351 | A | - | - |
| 1 | 161537042 | T | - | 1 | 161618432 | C | - | - |



|   |           |          |   |   |           |           |   |   |
|---|-----------|----------|---|---|-----------|-----------|---|---|
| 1 | 161537123 | C        | - | 1 | 161618508 | T         | - | - |
| 1 | 161537148 | G        | - | 1 | 161618533 | A         | - | - |
| 1 | 161537185 | C        | - | 1 | 161618570 | T         | - | - |
| 1 | 161537187 | A        | - | 1 | 161618572 | C         | - | - |
| 1 | 161537268 | T        | - | 1 | 161618653 | A         | - | - |
| 1 | 161537304 | G        | - | 1 | 161618689 | T         | - | - |
| 1 | 161537391 | A        | - | 1 | 161618775 | G         | - | - |
| 1 | 161537417 | A        | - | 1 | 161618801 | G         | - | - |
| 1 | 161537464 | deletion | - | 1 | 161618848 | insertion | - | - |
|   |           |          |   |   | -         |           |   |   |
|   |           |          |   |   | 161619296 |           |   |   |
| 1 | 161537532 | T        | - | 1 | 161619361 | C         | T | + |
| 1 | 161537534 | C        | - | 1 | 161619363 | G         | C | + |
| 1 | 161537811 | A        | - | 1 | 161619640 | G         | A | + |
| 1 | 161537898 | A        | - | 1 | 161619727 | G         | - | - |
| 1 | 161537999 | T        | - | 1 | 161619829 | A         | - | - |
| 1 | 161538044 | G        | - | 1 | 161619874 | T         | G | + |
| 1 | 161538110 | T        | - | 1 | 161619940 | C         | - | - |
| 1 | 161538198 | G        | - | 1 | 161620028 | T         | G | + |
| 1 | 161538208 | C        | - | 1 | 161620038 | T         | C | + |
| 1 | 161538215 | C        | - | 1 | 161620045 | G         | C | + |
| 1 | 161538243 | A        | T | 1 | 161620073 | T         | A | + |
| 1 | 161538275 | A        | - | 1 | 161620106 | G         | A | + |
| 1 | 161538410 | G        | - | 1 | 161620241 | C         | G | + |
| 1 | 161538418 | G        | - | 1 | 161620249 | C         | G | + |
| 1 | 161538423 | C        | - | 1 | 161620254 | T         | C | + |
| 1 | 161538434 | T        | - | 1 | 161620265 | G         | T | + |
| 1 | 161538484 | T        | C | 1 | 161620315 | C         | - | + |
| 1 | 161538507 | T        | C | 1 | 161620338 | C         | - | + |
| 1 | 161538677 | A        | - | 1 | 161620508 | G         | A | + |
| 1 | 161539026 | A        | T | 1 | 161620857 | T         | A | + |
| 1 | 161539097 | T        | C | 1 | 161620928 | C         | T | + |
| 1 | 161539644 | C        | T | 1 | 161621475 | T         | C | + |
| 1 | 161539848 | C        | T | 1 | 161621679 | T         | C | + |
| 1 | 161540069 | T        | C | 1 | 161621917 | C         | T | + |
| 1 | 161540078 | G        | A | 1 | 161621926 | A         | G | + |
| 1 | 161540132 | C        | T | 1 | 161621980 | T         | C | + |
| 1 | 161540241 | T        | C | 1 | 161622089 | C         | T | + |
| 1 | 161540253 | C        | A | 1 | 161622101 | A         | C | + |
| 1 | 161540335 | C        | T | 1 | 161622184 | T         | C | + |
| 1 | 161540337 | T        | A | 1 | 161622186 | A         | T | + |
| 1 | 161540347 | T        | C | 1 | 161622196 | C         | T | + |
| 1 | 161540381 | T        | C | 1 | 161622230 | C         | T | + |
| 1 | 161540400 | G        | A | 1 | 161622249 | A         | G | + |
| 1 | 161540484 | A        | G | 1 | 161622333 | G         | A | + |
| 1 | 161540652 | G        | A | 1 | 161622501 | A         | G | + |
| 1 | 161540663 | A        | G | 1 | 161622512 | G         | A | + |
| 1 | 161540689 | A        | G | 1 | 161622538 | G         | A | + |
| 1 | 161540698 | A        | C | 1 | 161622547 | C         | A | + |
| 1 | 161540703 | G        | C | 1 | 161622552 | C         | G | + |
| 1 | 161540847 | C        | A | 1 | 161622696 | A         | C | + |
| 1 | 161540849 | G        | A | 1 | 161622698 | A         | G | + |
| 1 | 161540856 | C        | T | 1 | 161622705 | T         | C | + |
| 1 | 161540860 | T        | C | 1 | 161622709 | C         | T | + |
| 1 | 161540986 | C        | G | 1 | 161622835 | G         | C | + |
| 1 | 161541005 | A        | G | 1 | 161622854 | G         | A | + |

|   |           |   |    |   |           |   |     |   |
|---|-----------|---|----|---|-----------|---|-----|---|
| 1 | 161541012 | C | T  | 1 | 161622861 | T | C   | + |
| 1 | 161541013 | A | G  | 1 | 161622862 | G | A   | + |
| 1 | 161541178 | C | G  | 1 | 161623025 | G | C   | + |
| 1 | 161541189 | C | A  | 1 | 161623036 | A | C   | + |
| 1 | 161541206 | A | C  | 1 | 161623053 | C | A   | + |
| 1 | 161541207 | G | A  | 1 | 161623054 | A | G   | + |
| 1 | 161541211 | C | T  | 1 | 161623058 | T | C   | + |
| 1 | 161541219 | G | A  | 1 | 161623066 | A | G   | + |
| 1 | 161541529 | A | T  | 1 | 161623376 | T | A   | + |
| 1 | 161541985 | C | T  | 1 | 161623832 | T | C   | + |
| 1 | 161542097 | G | A  | 1 | 161623944 | A | G   | + |
| 1 | 161542202 | T | C  | 1 | 161624049 | C | T   | + |
| 1 | 161542232 | T | C  | 1 | 161624079 | C | T   | + |
| 1 | 161542264 | T | C  | 1 | 161624111 | C | T   | + |
| 1 | 161542301 | T | A  | 1 | 161624148 | A | T   | + |
| 1 | 161542310 | G | T  | 1 | 161624158 | T | G   | + |
| 1 | 161542395 | A | C  | 1 | 161624236 | C | A   | + |
| 1 | 161542399 | T | C  | 1 | 161624240 | C | T   | + |
| 1 | 161542752 | C | T  | 1 | 161624593 | T | C   | + |
| 1 | 161542782 | C | T  | 1 | 161624623 | T | C   | + |
| 1 | 161543168 | G | C  | 1 | 161625008 | C | G   | + |
| 1 | 161544012 | T | G  | 1 | 161625852 | G | T   | + |
| 1 | 161544094 | A | G  | 1 | 161625934 | G | A   | + |
| 1 | 161544191 | A | T  | 1 | 161626031 | T | A   | + |
| 1 | 161544192 | A | G  | 1 | 161626032 | G | A   | + |
| 1 | 161544825 | T | A  | 1 | 161626665 | A | T   | + |
| 1 | 161546839 | C | A  | 1 | 161628679 | A | -   | + |
| 1 | 161548074 | T | -  | 1 | 161629914 | C | T   | + |
| 1 | 161548670 | G | -  | 1 | 161630510 | T | A/G | + |
| 1 | 161549159 | A | -  | 1 | 161630963 | G | A   | + |
| 1 | 161549172 | G | A  | 1 | 161630976 | A | G   | + |
| 1 | 161549179 | G | A  | 1 | 161630983 | A | G   | + |
| 1 | 161549183 | G | A  | 1 | 161630987 | A | G   | + |
| 1 | 161549188 | A | G  | 1 | 161630992 | G | A   | + |
| 1 | 161549246 | C | A  | 1 | 161631050 | A | C   | + |
| 1 | 161549249 | A | G  | 1 | 161631053 | G | A   | + |
| 1 | 161549253 | A | CG | 1 | 161631057 | G | A   | + |
| 1 | 161549257 | A | CG | 1 | 161631061 | C | A   | + |
| 1 | 161549265 | A | G  | 1 | 161631069 | G | A   | + |
| 1 | 161549269 | G | A  | 1 | 161631073 | A | G   | + |
| 1 | 161549274 | A | G  | 1 | 161631078 | G | A   | + |
| 1 | 161549280 | G | A  | 1 | 161631084 | A | G   | + |
| 1 | 161549360 | A | G  | 1 | 161631164 | G | A   | + |
| 1 | 161549361 | T | -  | 1 | 161631165 | C | T   | + |
| 1 | 161549369 | C | -  | 1 | 161631173 | T | C   | + |
| 1 | 161550075 | T | C  | 1 | 161631879 | C | T   | + |
| 1 | 161551775 | G | A  | 1 | 161633579 | A | G   | + |
| 1 | 161552385 | G | A  | 1 | 161634189 | A | G   | + |
| 1 | 161553141 | C | T  | 1 | 161634945 | T | C   | + |
| 1 | 161555371 | A | G  | 1 | 161637175 | G | A   | + |
| 1 | 161555486 | T | C  | 1 | 161637290 | C | T   | + |
| 1 | 161556239 | T | C  | 1 | 161638043 | C | T   | + |
| 1 | 161556804 | C | T  | 1 | 161638608 | T | C   | + |
| 1 | 161557147 | C | T  | 1 | 161638951 | T | -   | + |
| 1 | 161557481 | A | -  | 1 | 161639285 | G | A   | + |
| 1 | 161557565 | G | A  | 1 | 161639370 | A | -   | + |

|   |           |   |   |   |           |   |   |   |
|---|-----------|---|---|---|-----------|---|---|---|
| 1 | 161557634 | A | - | 1 | 161639464 | G | A | + |
| 1 | 161558957 | C | T | 1 | 161640787 | T | - | + |
| 1 | 161559065 | G | A | 1 | 161640895 | A | G | + |
| 1 | 161559076 | A | G | 1 | 161640906 | G | - | + |
| 1 | 161559153 | T | G | 1 | 161640983 | G | - | + |
| 1 | 161559164 | T | C | 1 | 161640994 | C | - | + |
| 1 | 161559176 | C | G | 1 | 161641006 | G | - | + |
| 1 | 161559241 | A | G | 1 | 161641071 | G | - | + |
| 1 | 161559256 | C | T | 1 | 161641086 | T | - | + |
| 1 | 161559302 | G | A | 1 | 161641132 | A | - | + |
| 1 | 161559307 | T | C | 1 | 161641137 | C | - | + |
| 1 | 161559322 | C | T | 1 | 161641152 | T | - | + |
| 1 | 161559326 | C | T | 1 | 161641156 | T | - | + |
| 1 | 161559327 | A | G | 1 | 161641157 | G | - | + |
| 1 | 161559387 | T | C | 1 | 161641217 | C | - | + |
| 1 | 161559407 | A | G | 1 | 161641237 | G | - | + |
| 1 | 161559466 | C | A | 1 | 161641296 | A | - | + |
| 1 | 161559653 | T | C | 1 | 161641483 | C | T | + |
| 1 | 161559693 | A | G | 1 | 161641523 | G | - | + |
| 1 | 161559742 | G | A | 1 | 161641572 | A | - | + |
| 1 | 161559753 | C | T | 1 | 161641583 | T | - | + |
| 1 | 161559765 | C | T | 1 | 161641596 | T | - | + |
| 1 | 161559784 | A | G | 1 | 161641615 | G | - | + |
| 1 | 161559787 | A | T | 1 | 161641618 | T | - | + |
| 1 | 161559849 | T | C | 1 | 161641680 | C | - | + |
| 1 | 161560354 | A | G | 1 | 161642185 | G | - | + |
| 1 | 161560402 | T | G | 1 | 161642233 | G | - | + |
| 1 | 161560425 | A | G | 1 | 161642256 | G | - | + |
| 1 | 161560520 | A | G | 1 | 161642351 | G | - | + |
| 1 | 161560528 | T | C | 1 | 161642359 | C | - | + |
| 1 | 161560531 | C | T | 1 | 161642362 | T | - | + |
| 1 | 161560544 | C | T | 1 | 161642375 | T | - | + |
| 1 | 161560602 | A | C | 1 | 161642433 | C | - | + |
| 1 | 161560712 | T | C | 1 | 161642543 | C | - | + |
| 1 | 161560731 | A | G | 1 | 161642562 | G | - | + |
| 1 | 161560789 | T | C | 1 | 161642620 | C | - | + |
| 1 | 161560852 | A | G | 1 | 161642683 | G | - | + |
| 1 | 161560914 | G | C | 1 | 161642745 | C | - | + |
| 1 | 161560921 | C | T | 1 | 161642752 | T | - | + |
| 1 | 161561194 | A | C | 1 | 161643025 | C | A | + |
| 1 | 161561213 | G | A | 1 | 161643044 | A | G | + |
| 1 | 161561287 | A | G | 1 | 161643118 | G | - | + |
| 1 | 161561496 | G | C | 1 | 161643327 | C | - | + |
| 1 | 161561540 | T | C | 1 | 161643371 | C | T | + |
| 1 | 161561577 | T | C | 1 | 161643408 | C | - | + |
| 1 | 161561676 | T | C | 1 | 161643507 | C | - | + |
| 1 | 161561681 | C | T | 1 | 161643512 | T | - | + |
| 1 | 161561696 | C | A | 1 | 161643527 | A | C | + |
| 1 | 161561698 | G | A | 1 | 161643529 | A | G | + |
| 1 | 161561702 | G | A | 1 | 161643533 | A | G | + |
| 1 | 161561715 | C | T | 1 | 161643546 | T | C | + |
| 1 | 161561734 | G | A | 1 | 161643565 | A | - | + |
| 1 | 161562403 | C | G | 1 | 161644234 | G | - | + |
| 1 | 161562417 | T | G | 1 | 161644248 | G | T | + |
| 1 | 161562421 | C | T | 1 | 161644252 | T | C | + |
| 1 | 161562422 | A | G | 1 | 161644253 | G | - | + |

|   |           |   |   |   |           |   |   |   |
|---|-----------|---|---|---|-----------|---|---|---|
| 1 | 161562477 | G | - | 1 | 161644308 | A | G | + |
| 1 | 161562556 | T | - | 1 | 161644387 | A | T | + |
| 1 | 161562577 | C | - | 1 | 161644408 | T | - | - |
| 1 | 161562591 | C | G | 1 | 161644422 | G | - | + |
| 1 | 161562793 | A | T | 1 | 161644624 | T | - | + |
| 1 | 161562832 | C | - | 1 | 161644663 | T | C | + |
| 1 | 161562985 | C | - | 1 | 161644816 | A | - | - |
| 1 | 161563039 | T | C | 1 | 161644870 | C | - | + |
| 1 | 161563061 | G | - | 1 | 161644892 | A | - | - |
| 1 | 161563065 | C | - | 1 | 161644896 | T | - | - |
| 1 | 161563113 | G | - | 1 | 161644944 | T | - | - |
| 1 | 161563221 | T | C | 1 | 161645052 | C | T | + |
| 1 | 161563332 | C | - | 1 | 161645163 | G | - | - |
| 1 | 161563339 | C | - | 1 | 161645170 | G | - | - |
| 1 | 161563356 | G | - | 1 | 161645187 | A | - | - |
| 1 | 161563387 | G | - | 1 | 161645218 | A | - | - |
| 1 | 161563401 | C | - | 1 | 161645232 | T | - | - |
| 1 | 161563421 | T | - | 1 | 161645252 | C | - | - |
| 1 | 161563428 | G | - | 1 | 161645259 | T | G | + |
| 1 | 161563452 | T | - | 1 | 161645283 | C | - | - |
| 1 | 161563498 | G | - | 1 | 161645329 | A | - | - |
| 1 | 161563537 | A | - | 1 | 161645368 | G | - | - |
| 1 | 161563578 | T | - | 1 | 161645409 | C | T | + |
| 1 | 161563604 | G | - | 1 | 161645435 | A | - | - |
| 1 | 161563640 | C | - | 1 | 161645471 | A | C | + |
| 1 | 161563695 | C | - | 1 | 161645526 | T | - | - |
| 1 | 161563696 | A | - | 1 | 161645527 | G | - | - |
| 1 | 161563768 | A | - | 1 | 161645599 | G | - | - |
| 1 | 161563801 | G | - | 1 | 161645632 | A | - | - |
| 1 | 161563837 | G | - | 1 | 161645668 | A | - | - |
| 1 | 161563841 | G | - | 1 | 161645672 | A | - | - |
| 1 | 161563846 | C | - | 1 | 161645677 | T | - | - |
| 1 | 161563847 | A | - | 1 | 161645678 | G | - | - |
| 1 | 161563894 | C | - | 1 | 161645725 | T | - | - |
| 1 | 161563990 | C | - | 1 | 161645821 | T | - | - |
| 1 | 161563998 | G | - | 1 | 161645829 | A | - | - |
| 1 | 161564000 | C | - | 1 | 161645831 | T | - | - |

**Table S2. Hydatidiform Mole BAC Clones Sequenced by Sanger Sequencing**

| clone ID    | accession | version | length [bp] |
|-------------|-----------|---------|-------------|
| CH17-116H17 | AC243898  | 2       | 233,801     |
| CH17-318H14 | AC243440  | 1       | 107,857     |
| CH17-135E1  | AC243509  | 1       | 130,018     |
| CH17-478A19 | AC243424  | 2       | 203,902     |
| CH17-24I15  | AC243499  | 2       | 199,928     |

**Table S3. Summary of FcγRIIb Expression in Relation to *FCGR3B* Copy Number**

| individual ID | <i>FCGR3B</i> copy number | frequency of 2B6+ cells [%] |             | 2B6+ mean fluorescence |             |
|---------------|---------------------------|-----------------------------|-------------|------------------------|-------------|
|               |                           | CD19+ cells                 | CD56+ cells | CD19+ cells            | CD56+ cells |
| 1             | 2                         | 96.9                        | 1.1         | 223.7                  | ND          |
| 2             | 2                         | 99.5                        | 2.1         | 233.4                  | ND          |
| 3             | 2                         | 95.4                        | 1.3         | 224.8                  | ND          |
| 4             | 2                         | 99.1                        | 3.5         | 198.3                  | ND          |
| 5             | 2                         | 97.3                        | 2.0         | 141.7                  | ND          |
| 6             | 2                         | 97.5                        | 3.6         | 169.2                  | ND          |
| 7             | 2                         | 98.3                        | 4.4         | 209.1                  | ND          |
| 8             | 2                         | 98.6                        | 2.2         | 234.3                  | ND          |
| 9             | 2                         | 97.5                        | 0.7         | 195.4                  | ND          |
| 10            | 2                         | 96.1                        | 2.3         | 259.9                  | ND          |
| 11            | 2                         | 98.8                        | 3.2         | 174.7                  | ND          |
| 12            | 2                         | 99.0                        | 1.3         | 230.0                  | ND          |
| 13            | 2                         | 99.0                        | 2.9         | 189.6                  | ND          |
| 14            | 2                         | 97.5                        | 2.9         | 221.1                  | ND          |
| 15            | 2                         | 99.6                        | 5.1         | 207.6                  | ND          |
| 16            | 1                         | 98.1                        | 73.2        | 231.9                  | 25.0        |
| 17            | 1                         | 99.1                        | 82.9        | 262.9                  | 31.8        |
| 18            | 1                         | 99.1                        | 62.4        | 266.3                  | 25.7        |
| 19            | 1                         | 98.9                        | 82.5        | 256.1                  | 27.8        |
| 20            | 1                         | 99.1                        | 53.1        | 166.3                  | 14.4        |
| 799.1.1       | 1                         | 99.3                        | 69.6        | 175.3                  | 14.5        |
| 799.1.2       | 1                         | 99.8                        | 60.5        | 220.0                  | 20.7        |
| 810.1.2       | 1                         | 98.7                        | 45.4        | 110.2                  | 16.5        |
| 511.1.1       | 1                         | 99.8                        | 70.8        | 323.5                  | 44.7        |
| 511.1.2       | 1                         | 100.0                       | 65.8        | 321.9                  | 33.4        |
| 603.1.1       | 1                         | 96.9                        | 75.9        | 224.6                  | 24.5        |
| 799.2.1       | 0                         | 99.6                        | 74.4        | 202.7                  | 29.1        |
| 810.1.1       | 0                         | 99.0                        | 84.5        | 177.8                  | 23.4        |
| 810.2.2       | 0                         | 98.3                        | 60.1        | 135.3                  | 26.0        |
| 511.2.2       | 0                         | 98.9                        | 62.5        | 579.9                  | 119.9       |
| 603.2.2       | 0                         | 98.9                        | 87.0        | 259.8                  | 37.6        |

Individuals numbered 1 – 20 are unrelated; the remaining 11 are related and are given a family designation followed by a unique identifier. ND = not detected.
